# Supplementary material for: New fluoride-promoted hypoiodite-catalytic oxidative cycloetherification to aromatic spiroketals
Source: Royal Society of Chemistry journal article supplement (doi:10.1039/c2ob25085c), 2012-01-01

## Electronic Supplementary Information

### *New Fluoride-promoted Hypiodite-catalytic Oxidative*

### *Cycloetherification to Aromatic Spiroketal*

Wei Wei, Liqi Li, Xiaohong Lin, Haifeng Li, Jijun Xue\*, and Ying Li\*

State Key Laboratory of Applied Organic Chemistry & Department of Chemistry,  
Lanzhou University, Lanzhou 730000, P. R. China

Email: liying@lzu.edu.cn

## Table of Contents

|                                                                 |        |
|-----------------------------------------------------------------|--------|
| General Information.....                                        | S2     |
| <sup>1</sup> H and <sup>13</sup> C NMR Spectra of Products..... | S3-S34 |

### General Information

$^1\text{H}$  and  $^{13}\text{C}$  NMR spectra were recorded in  $\text{CDCl}_3$  or  $\text{DMSO-D}_6$  solution on Bruker AX-400 MHz instruments and spectral data were reported in ppm relative to tetramethylsilane (TMS) as internal standard. Mass spectra (MS) were measured on spectrometer by direct inlet at 70 eV and signals were given in m/z with relative intensity (%) in brackets. High-resolution mass spectral analysis (HRMS) data were measured on the Bruker Apex II by means of the ESI technique.

# <sup>1</sup>H, <sup>13</sup>C NMR Spectra of Products

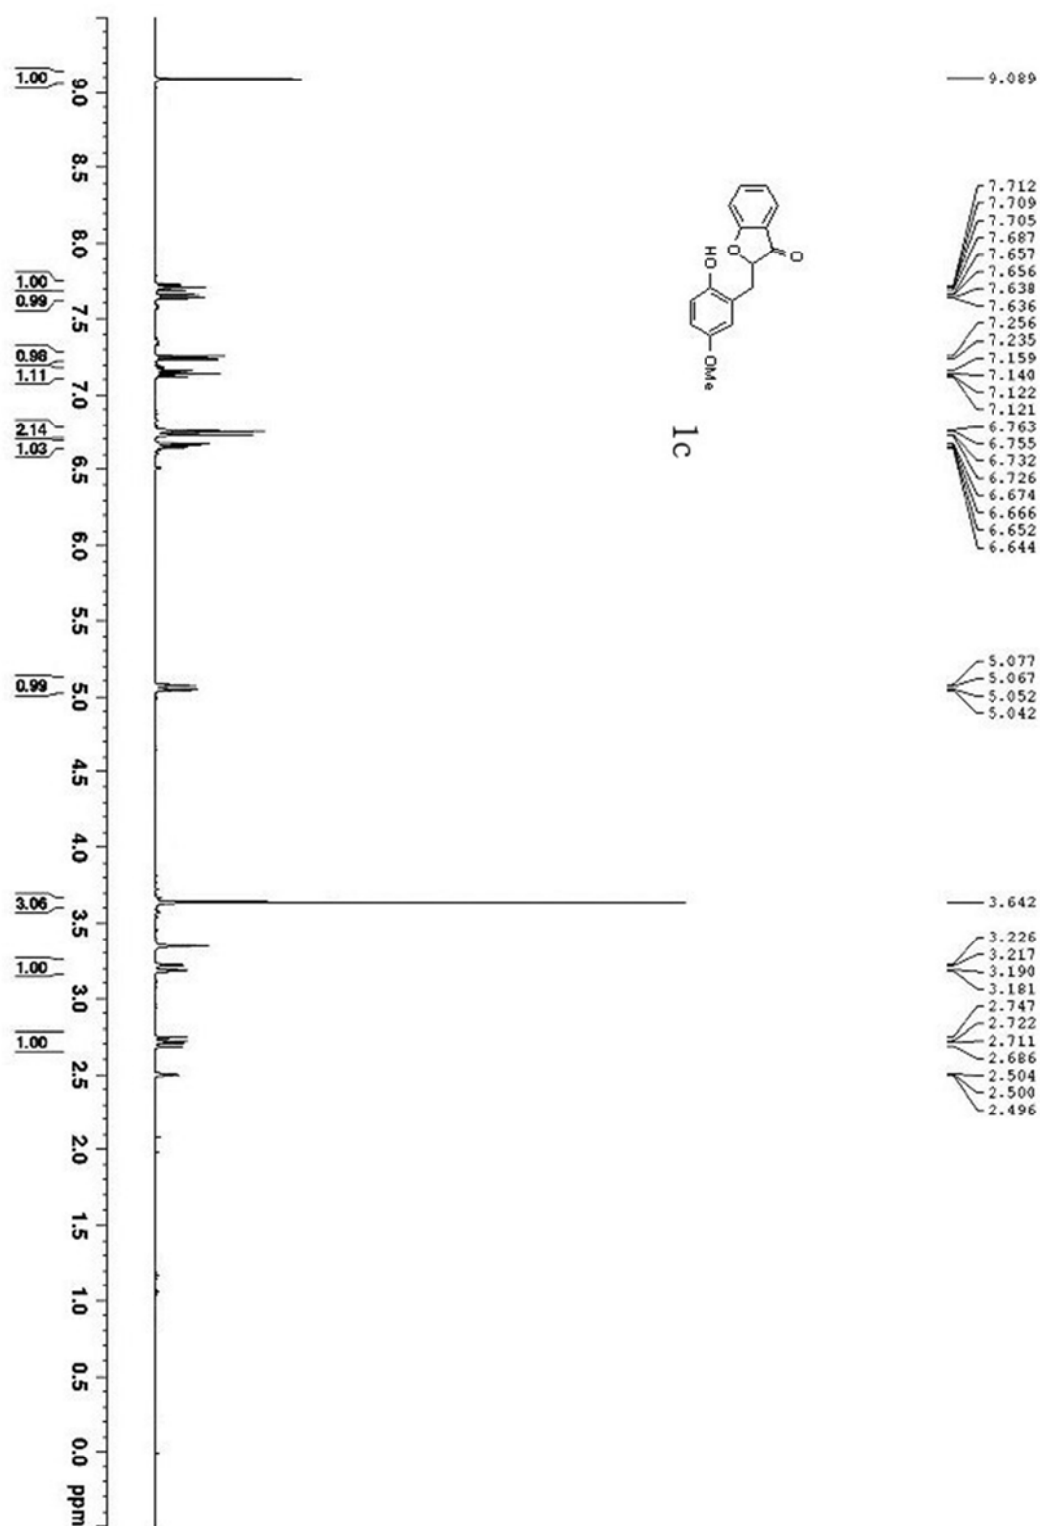

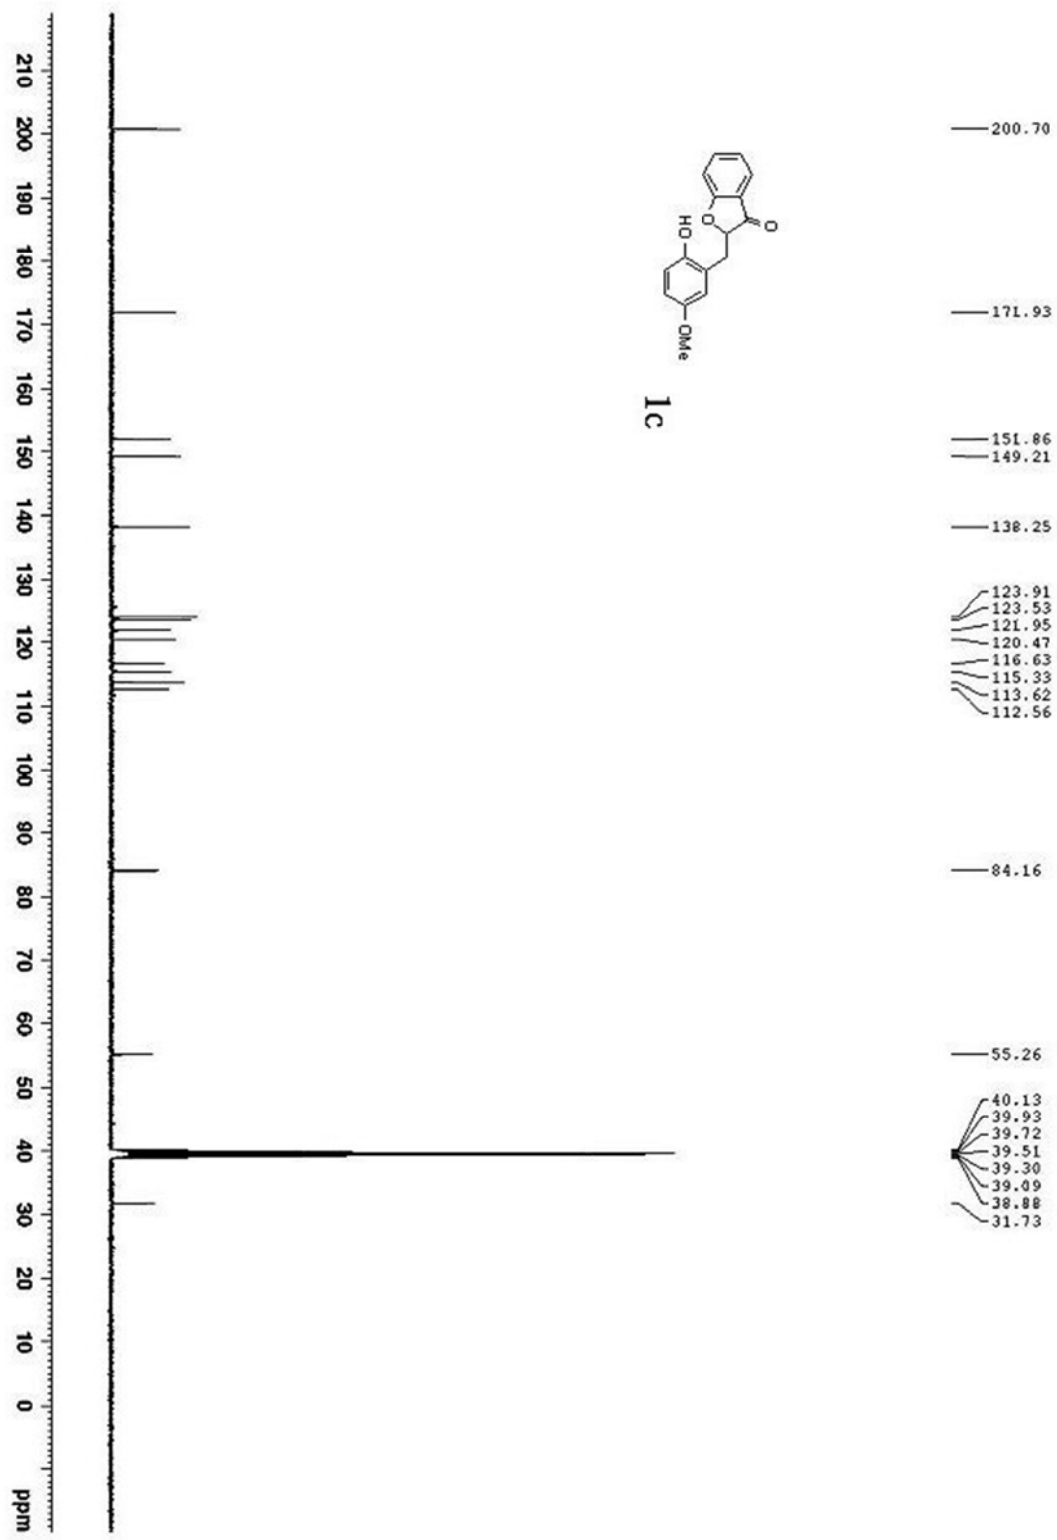

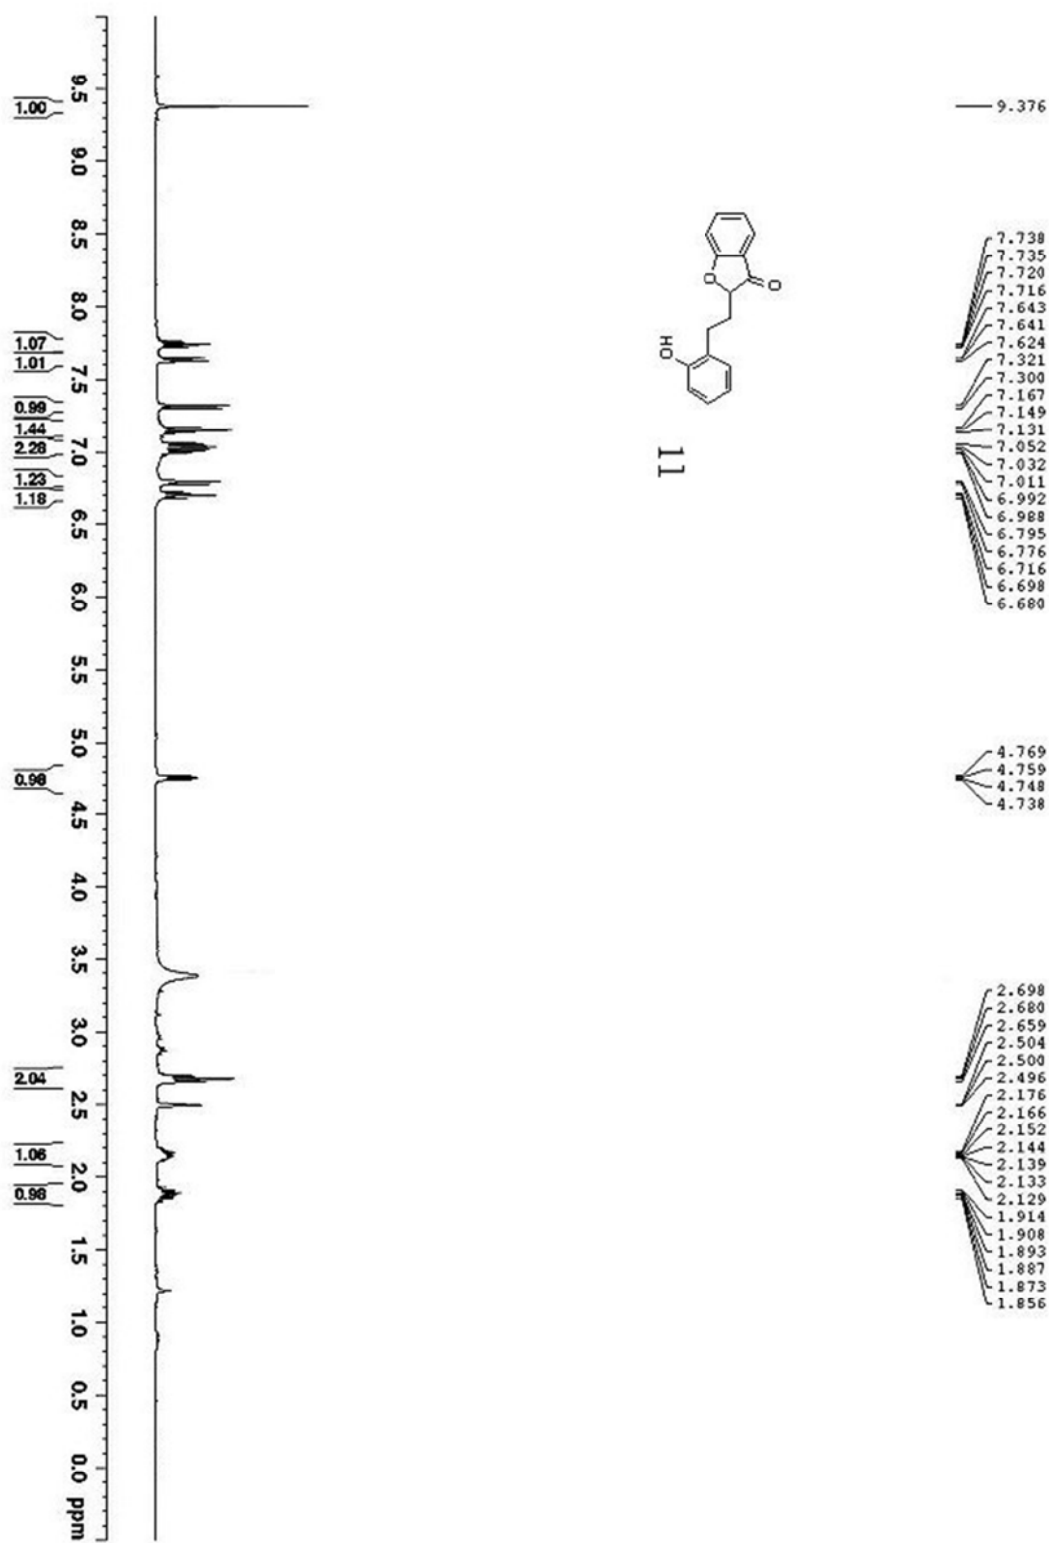

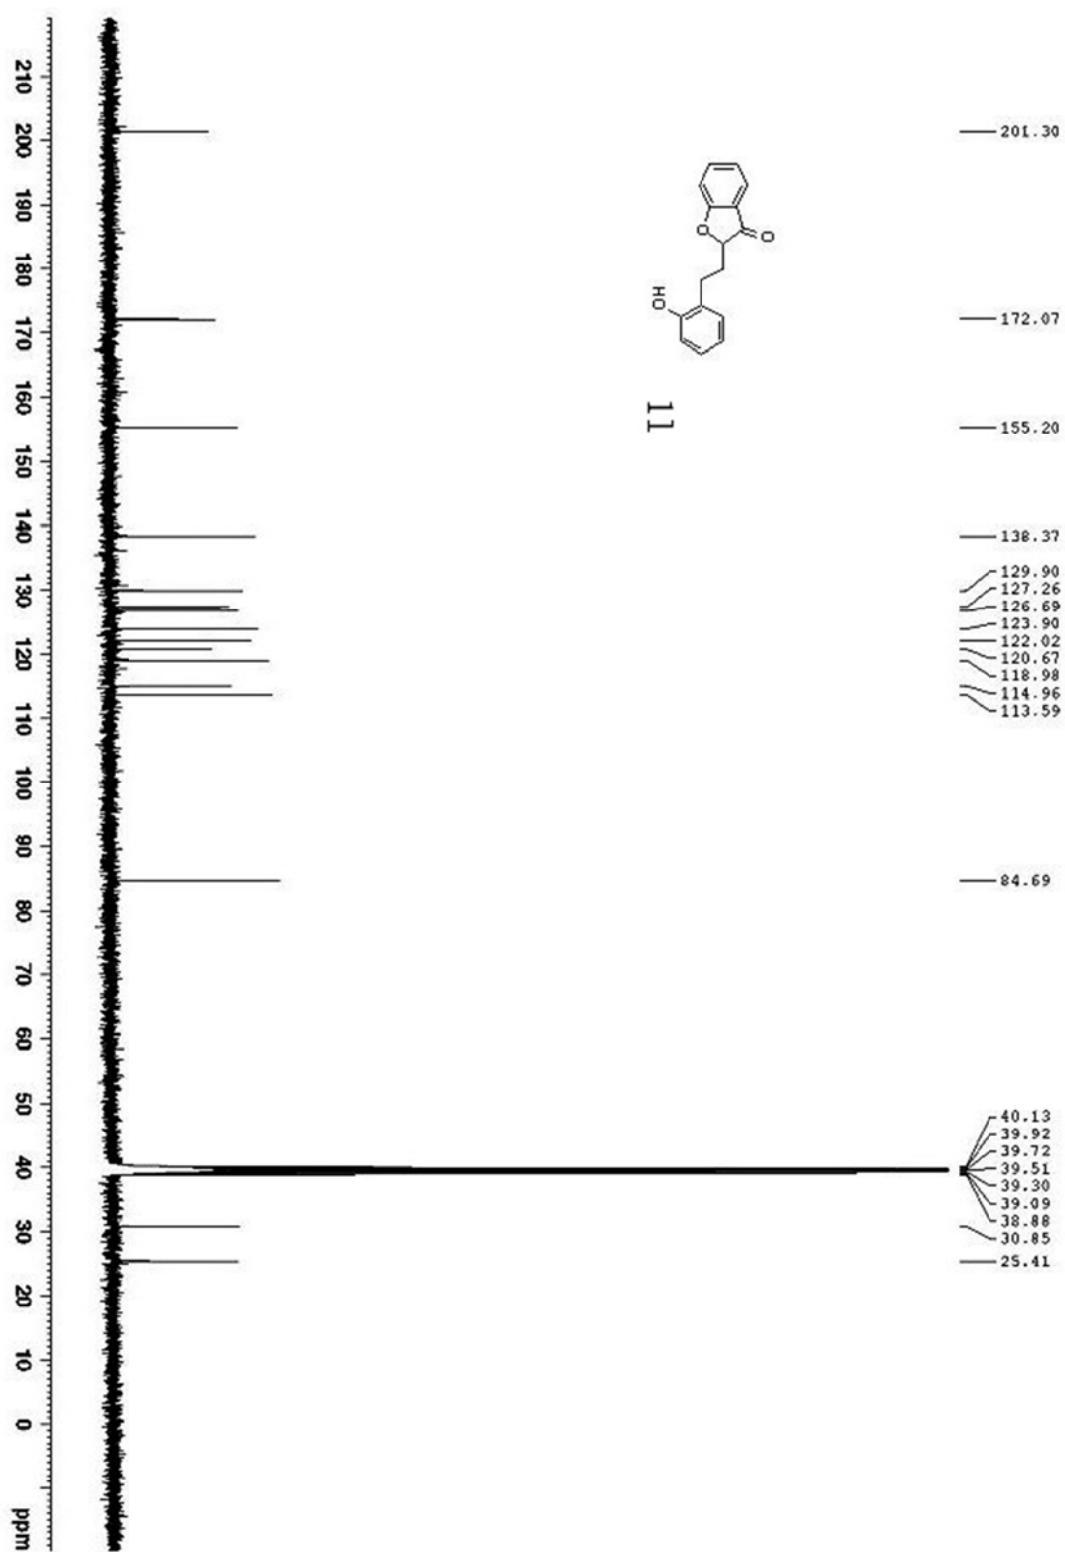

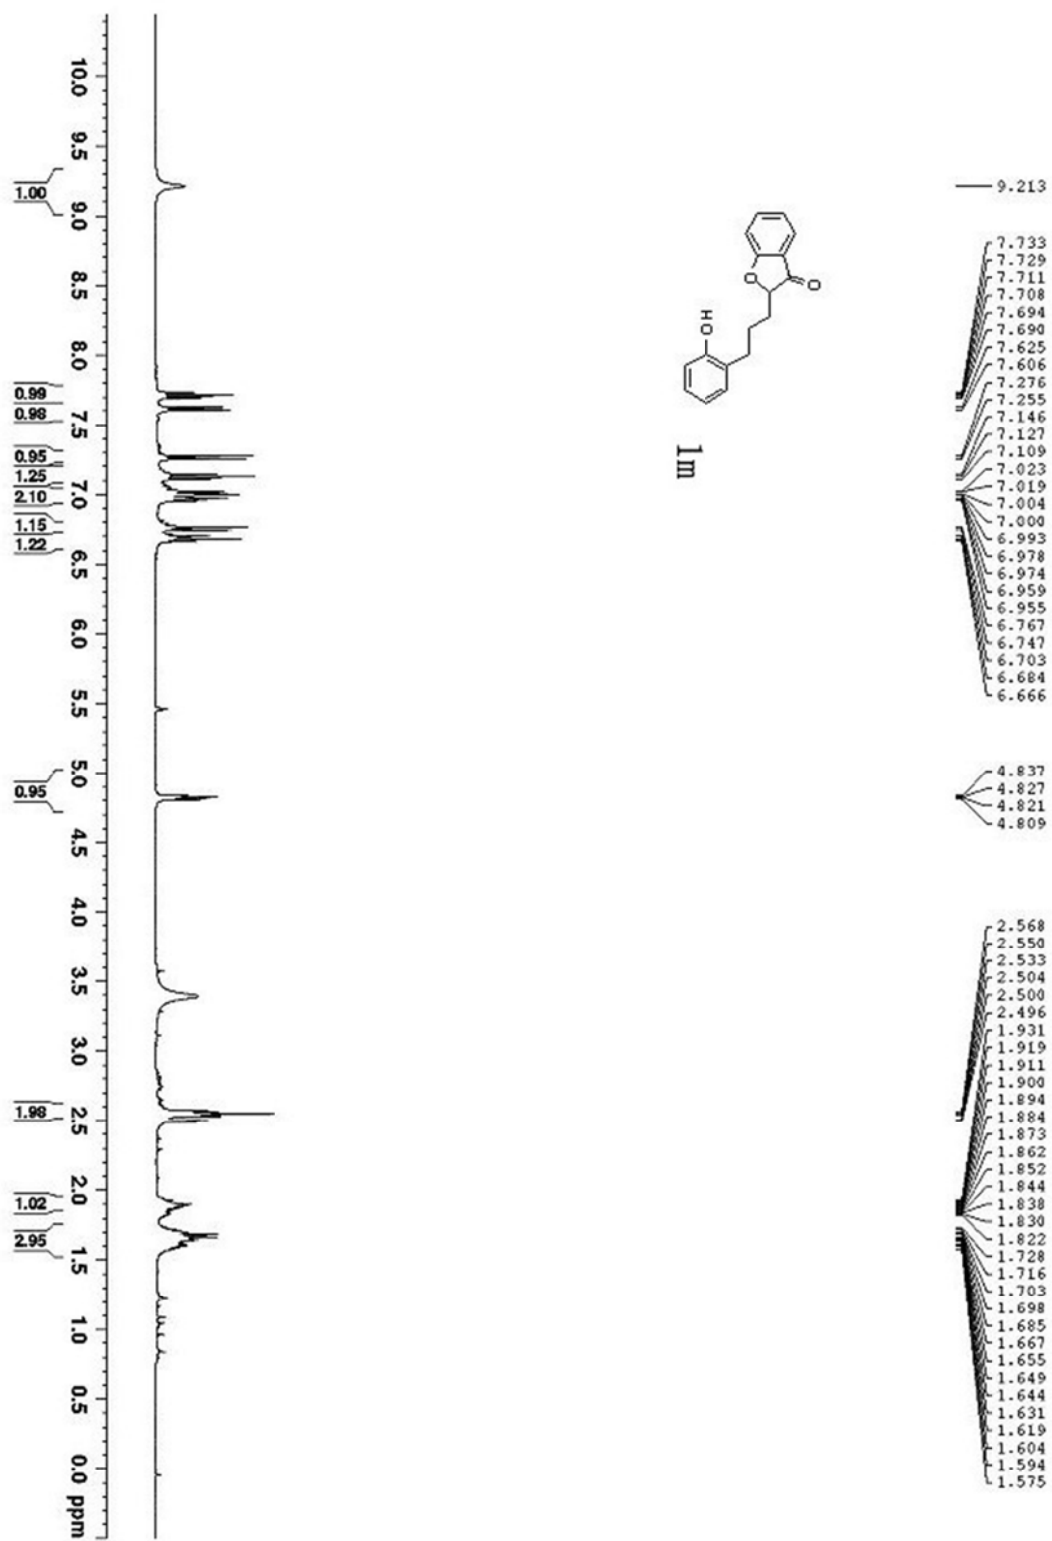

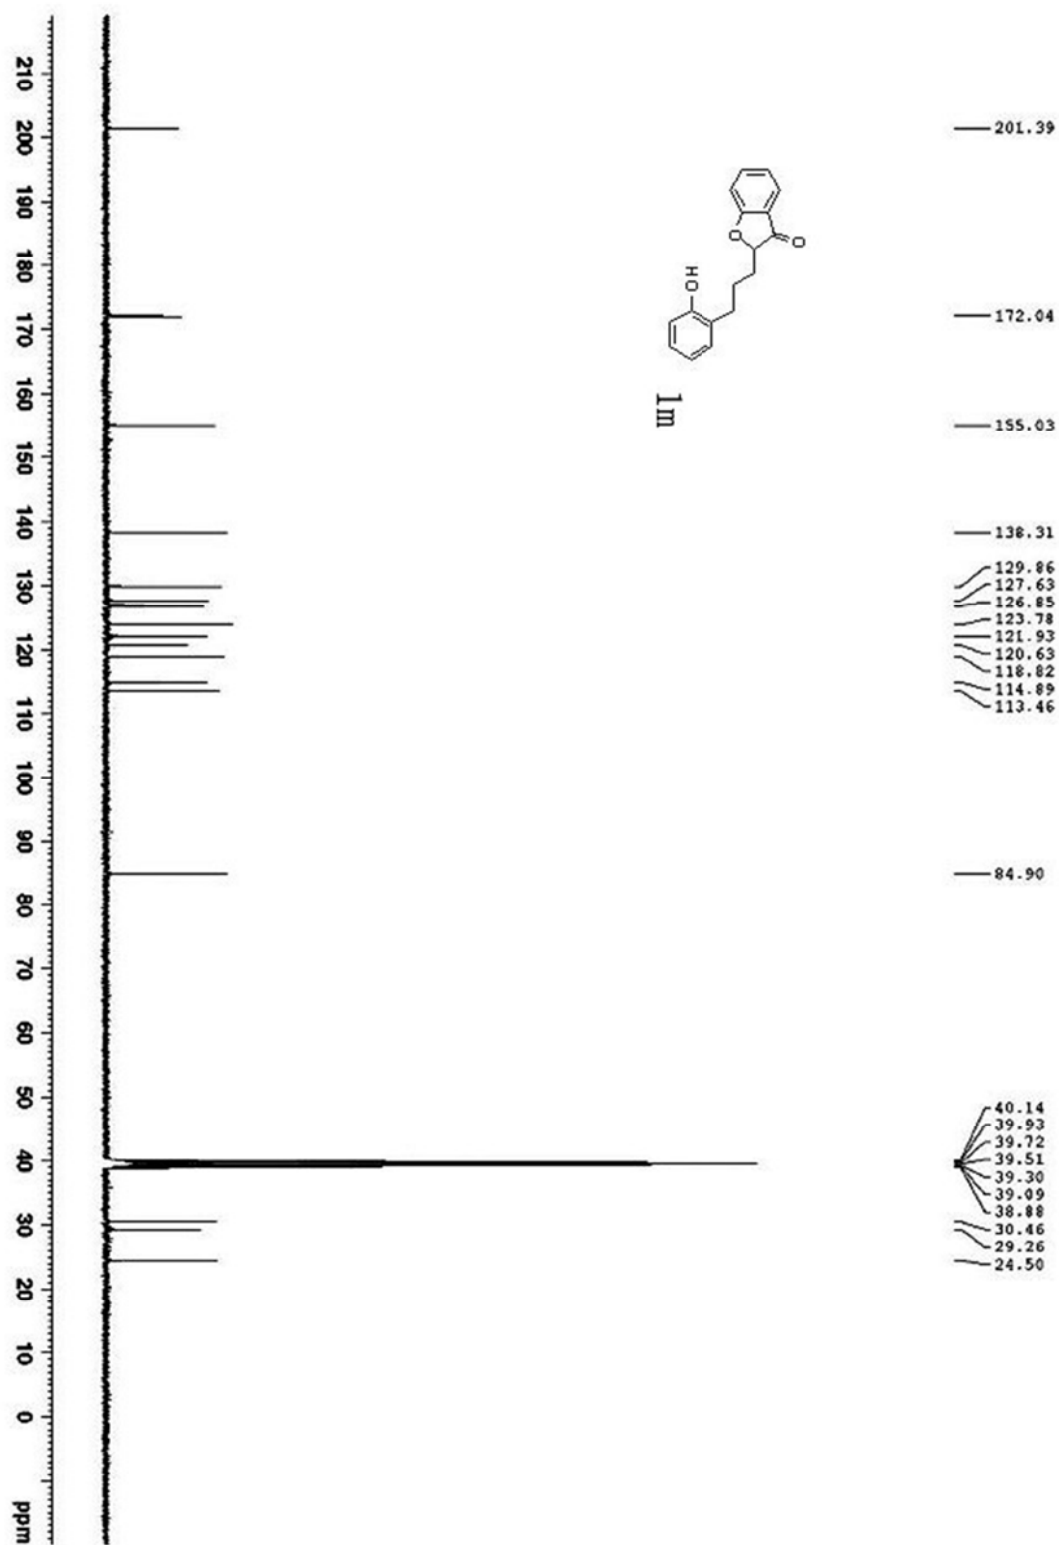



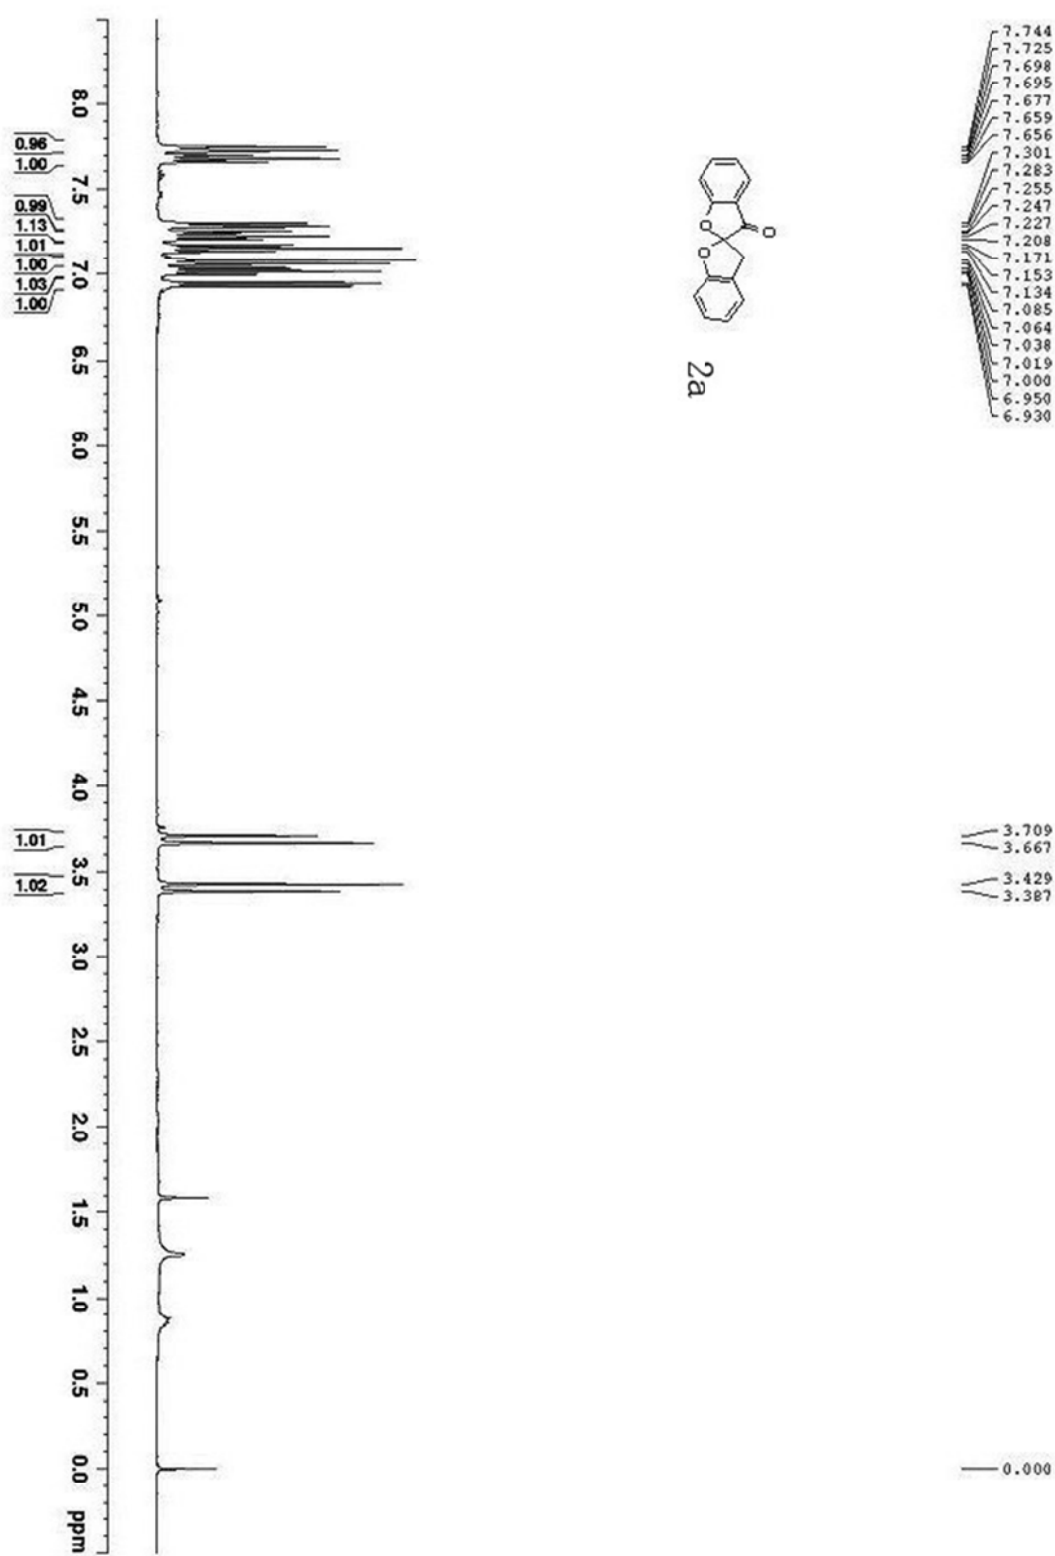

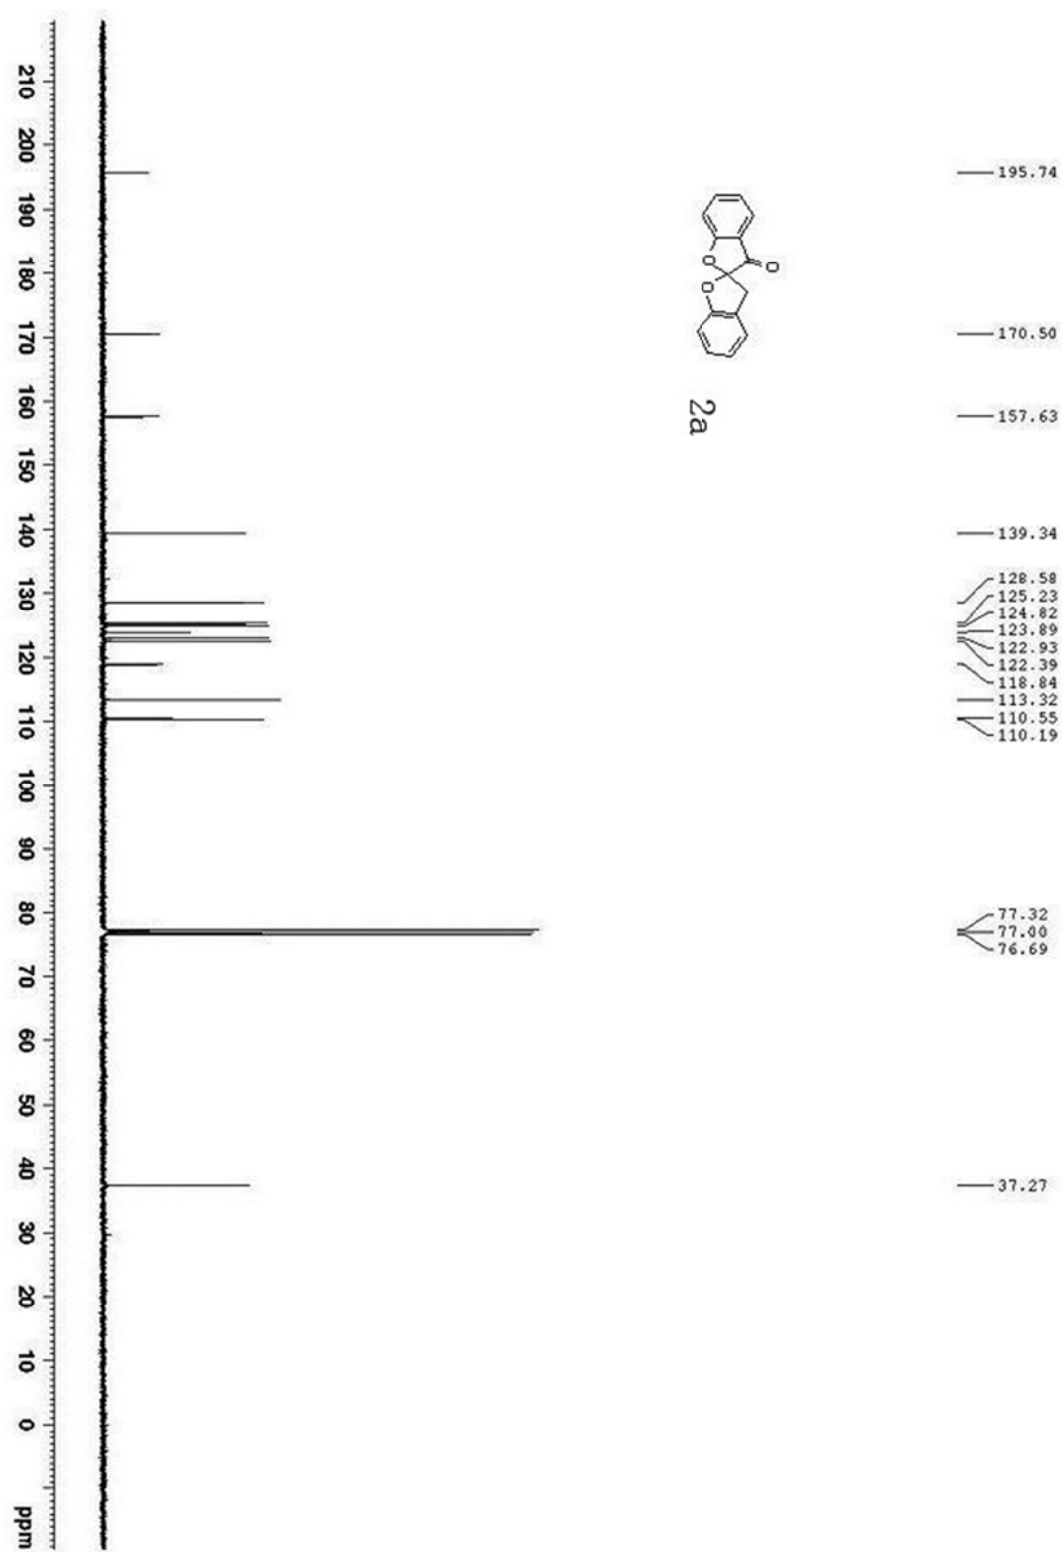

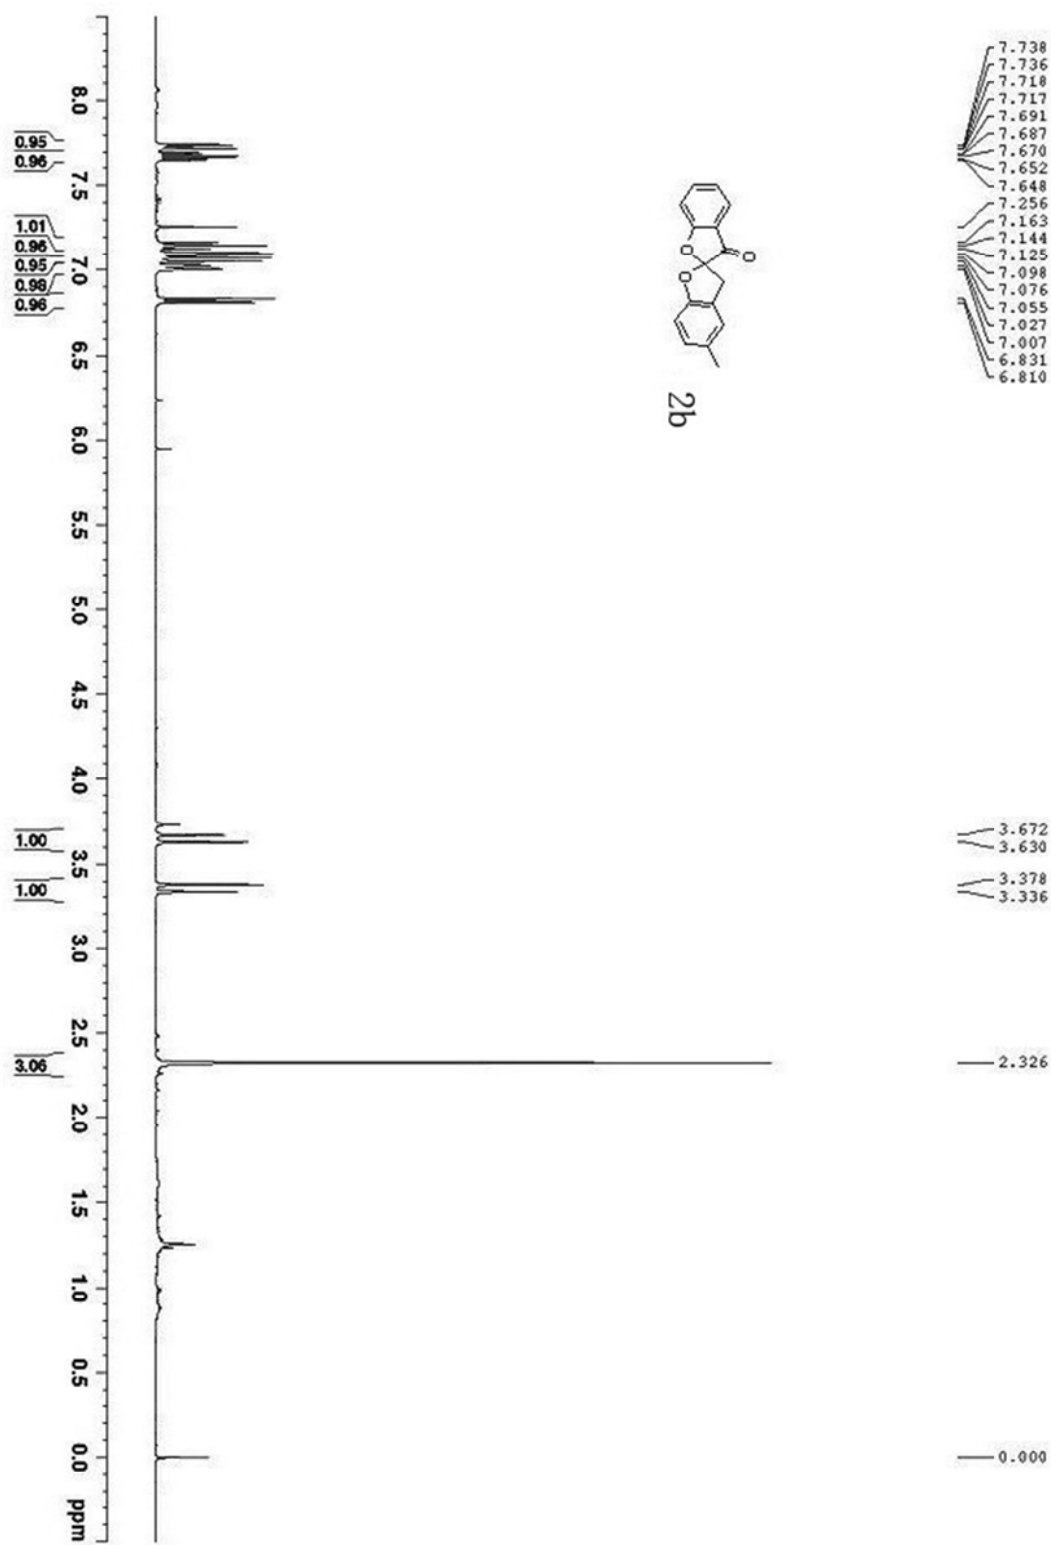

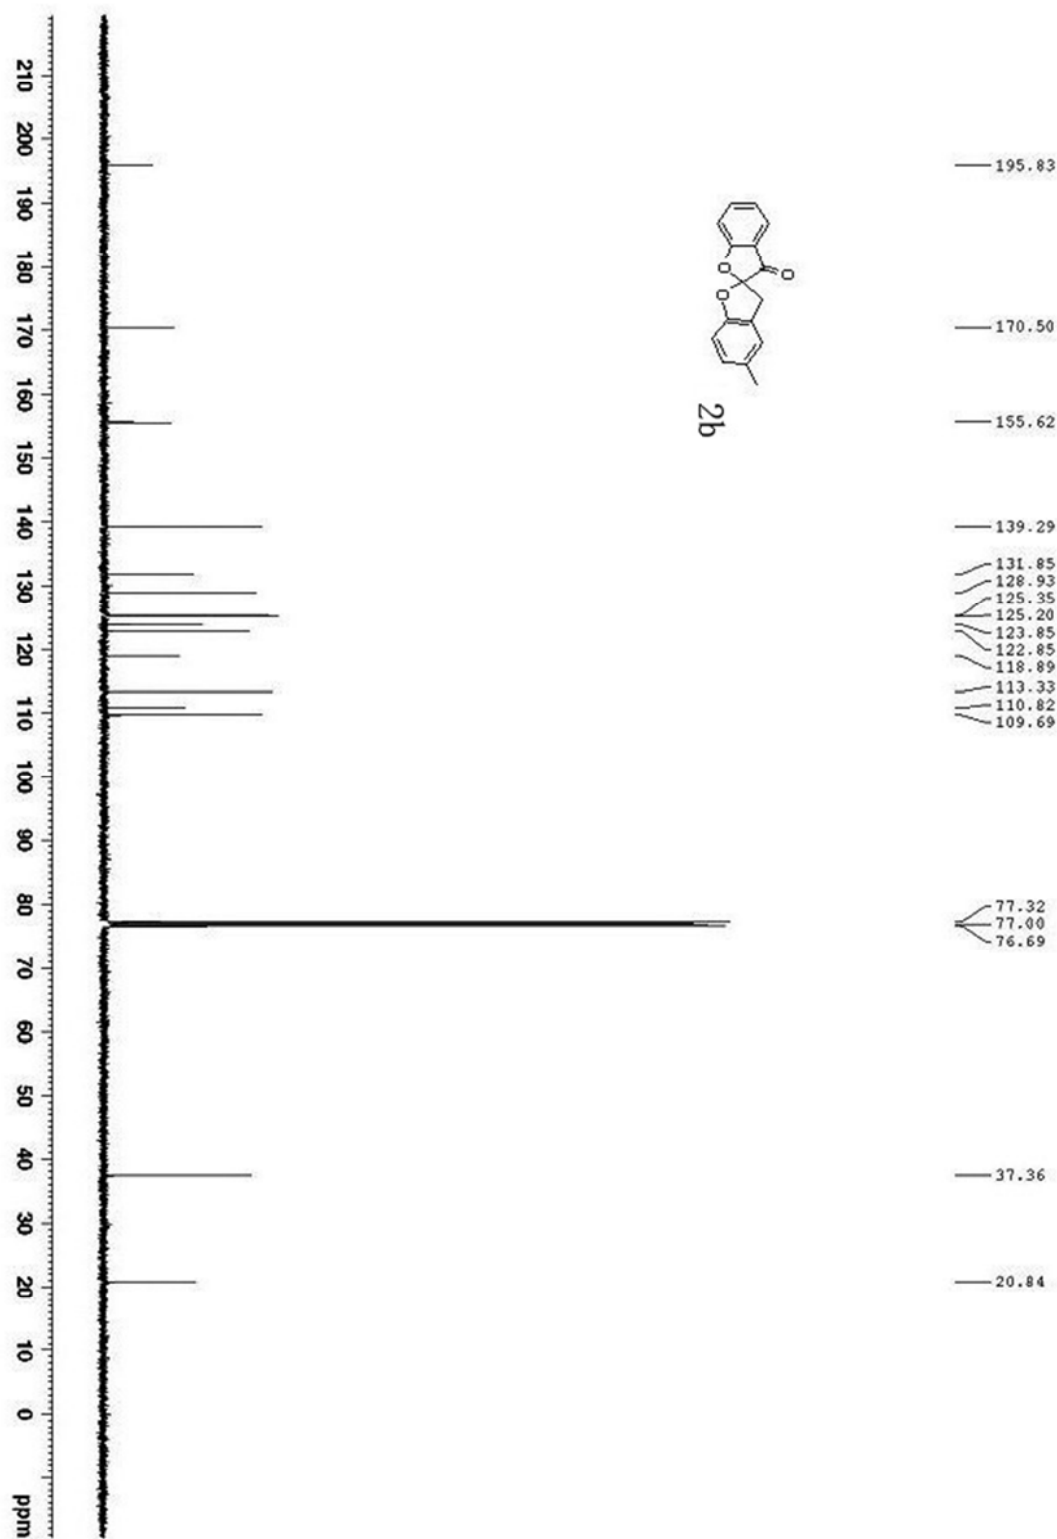

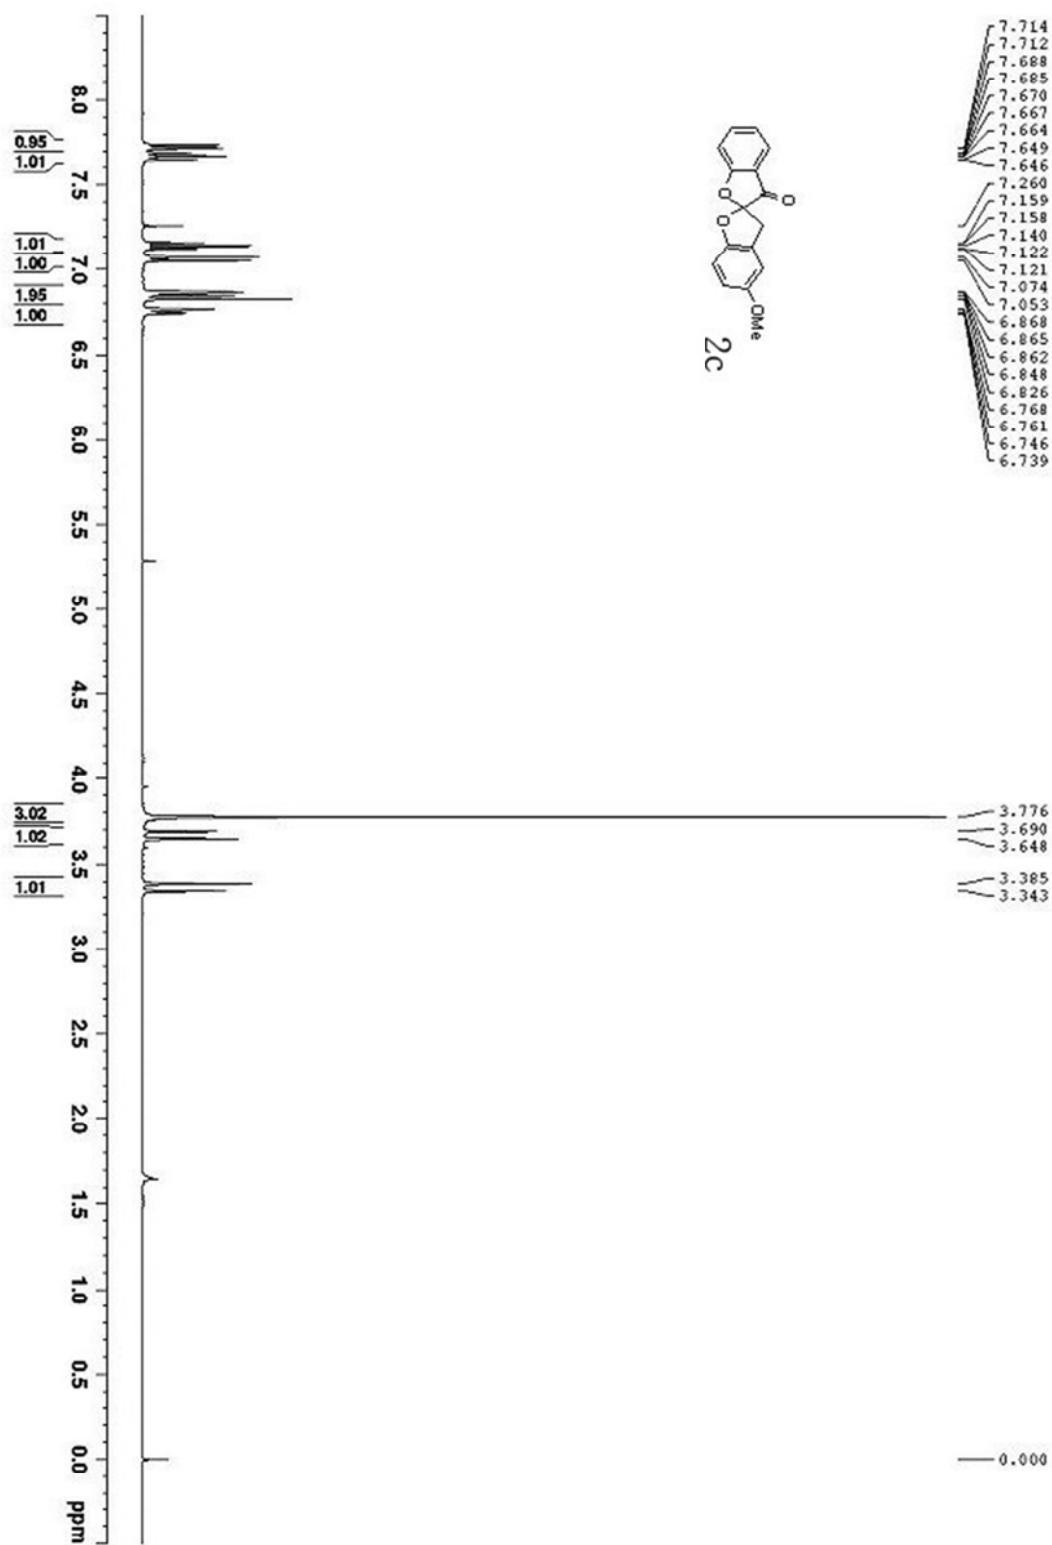

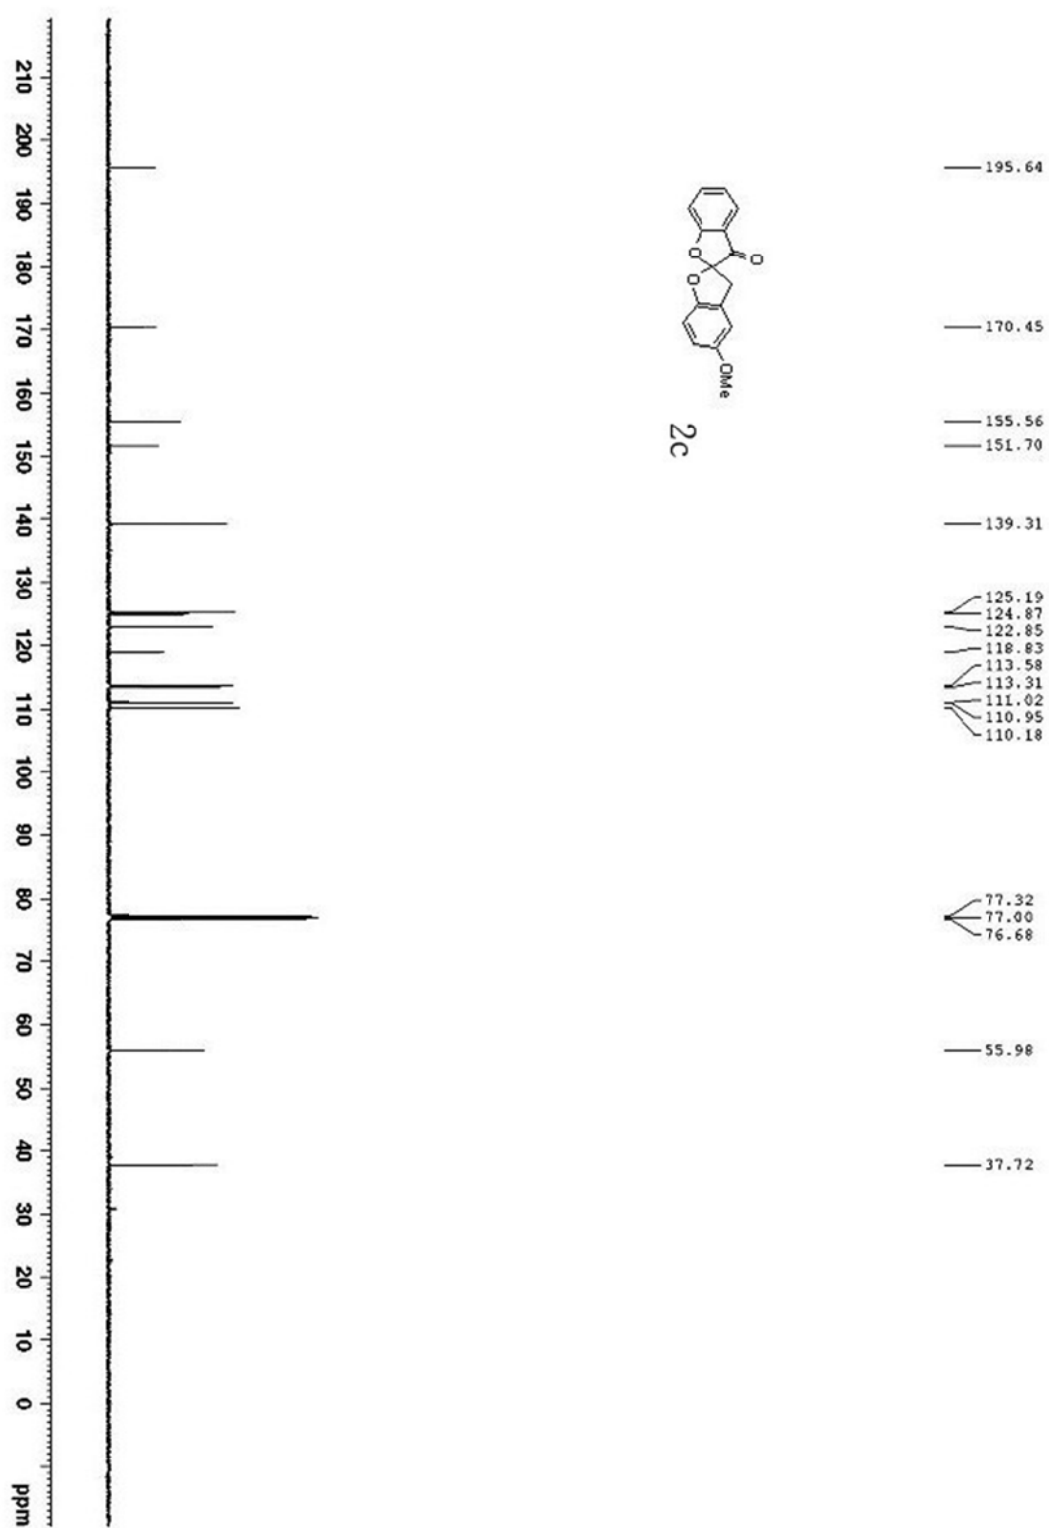

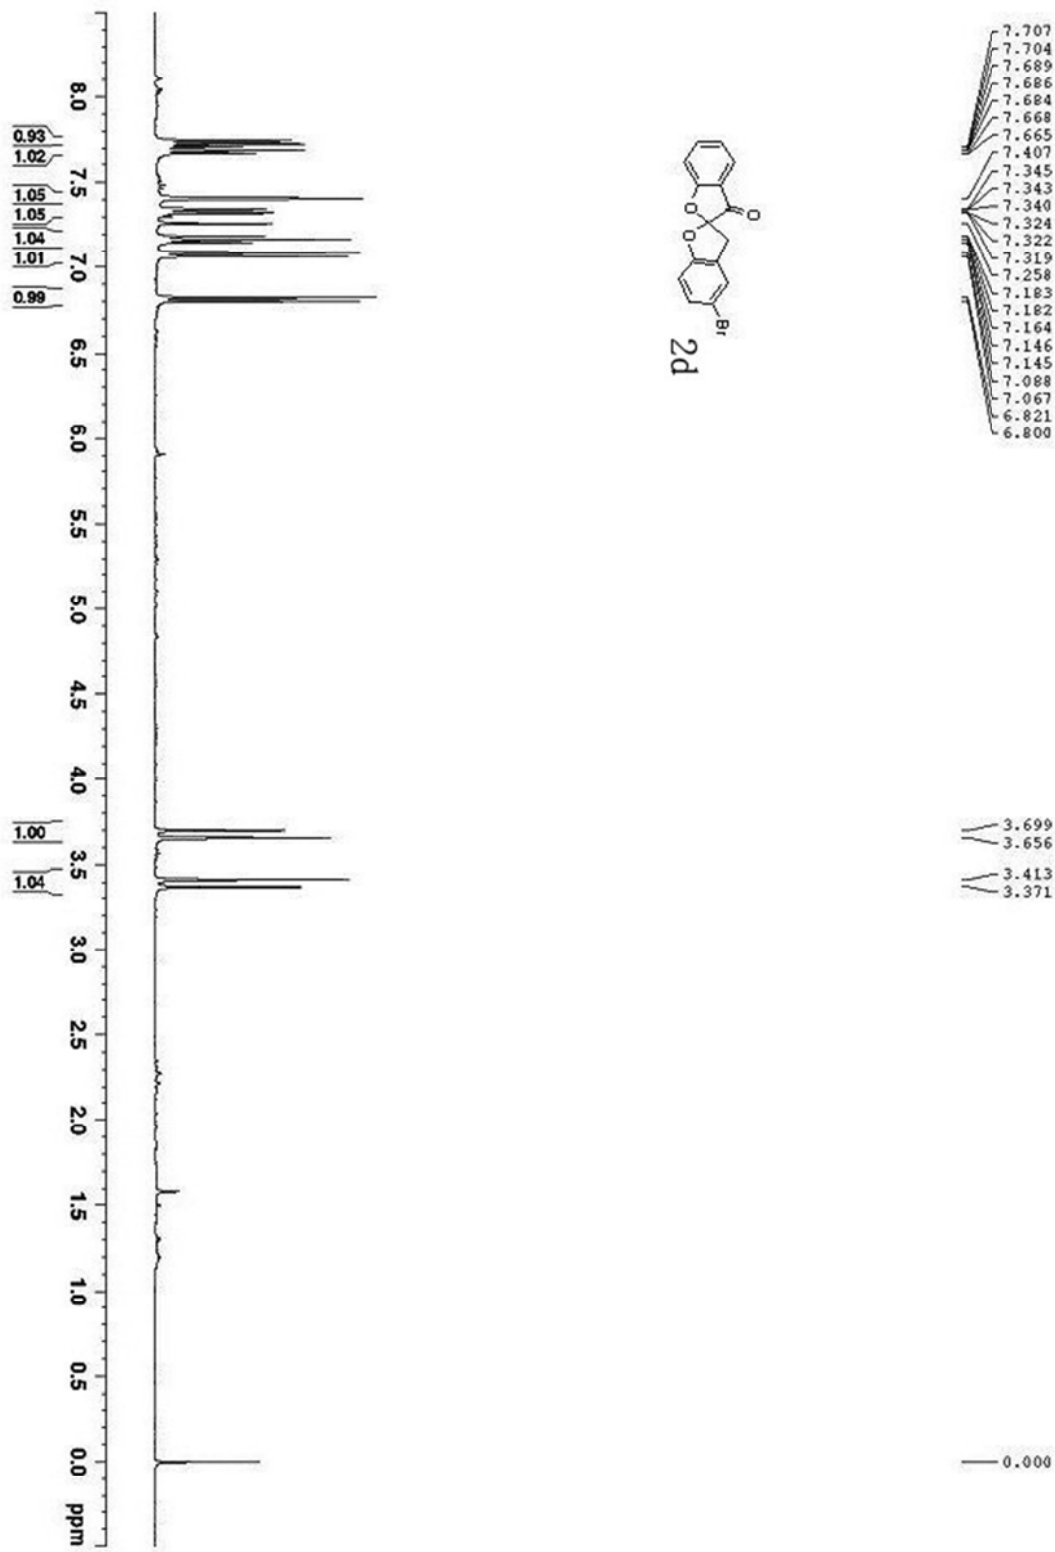

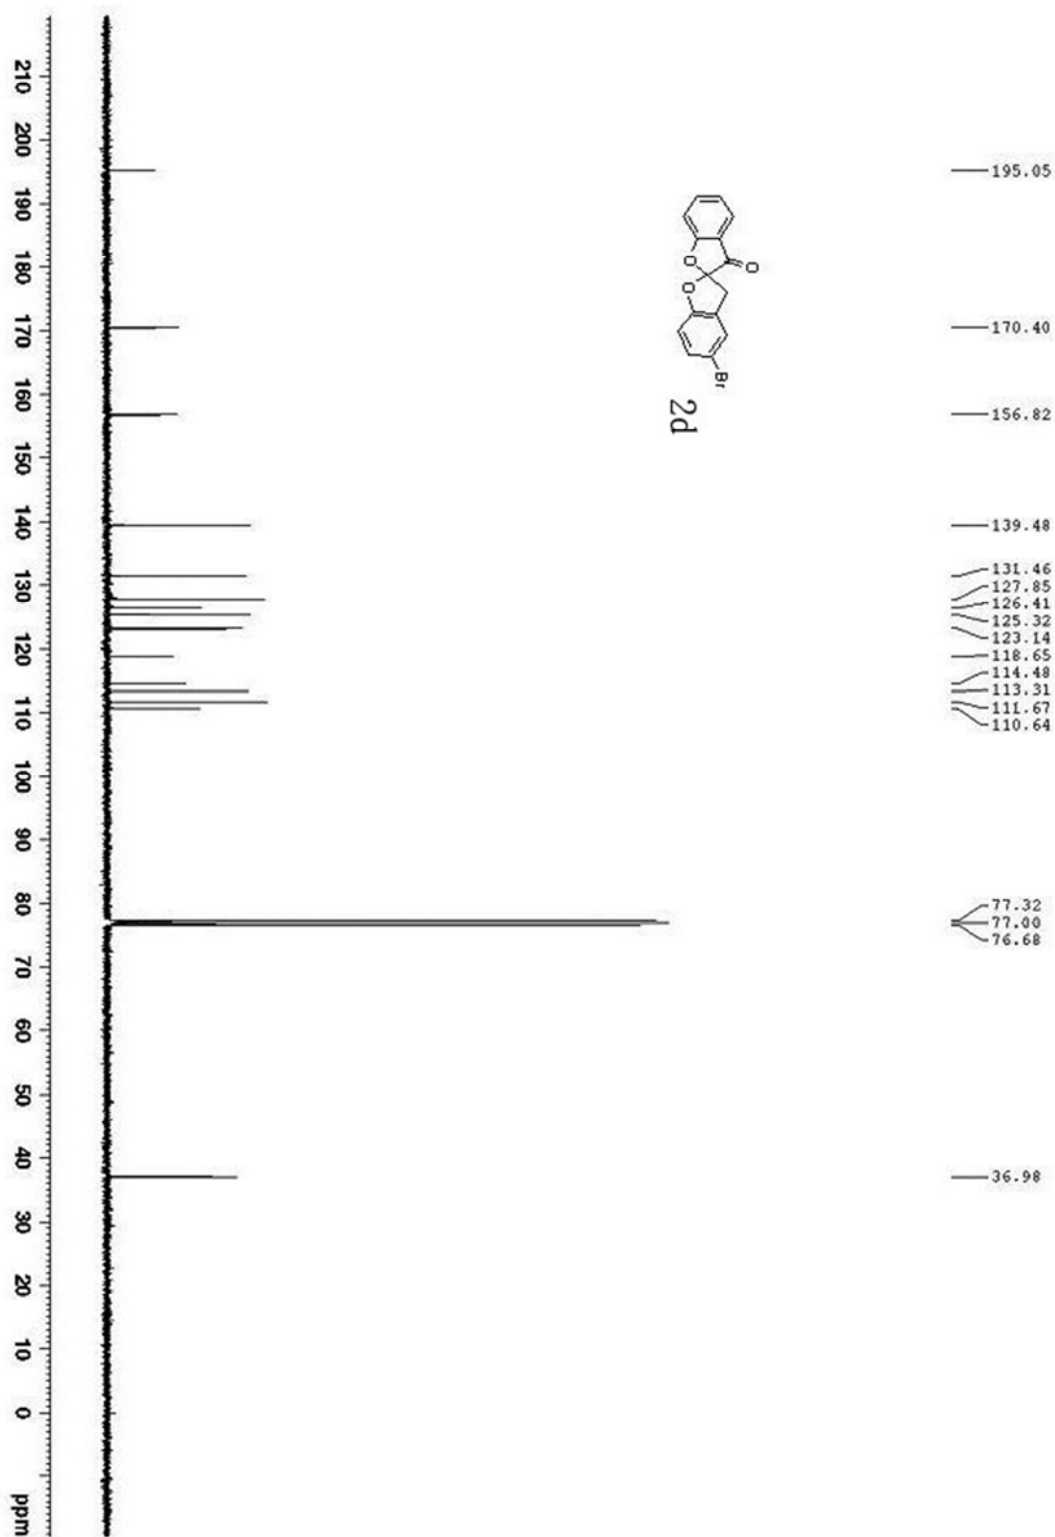



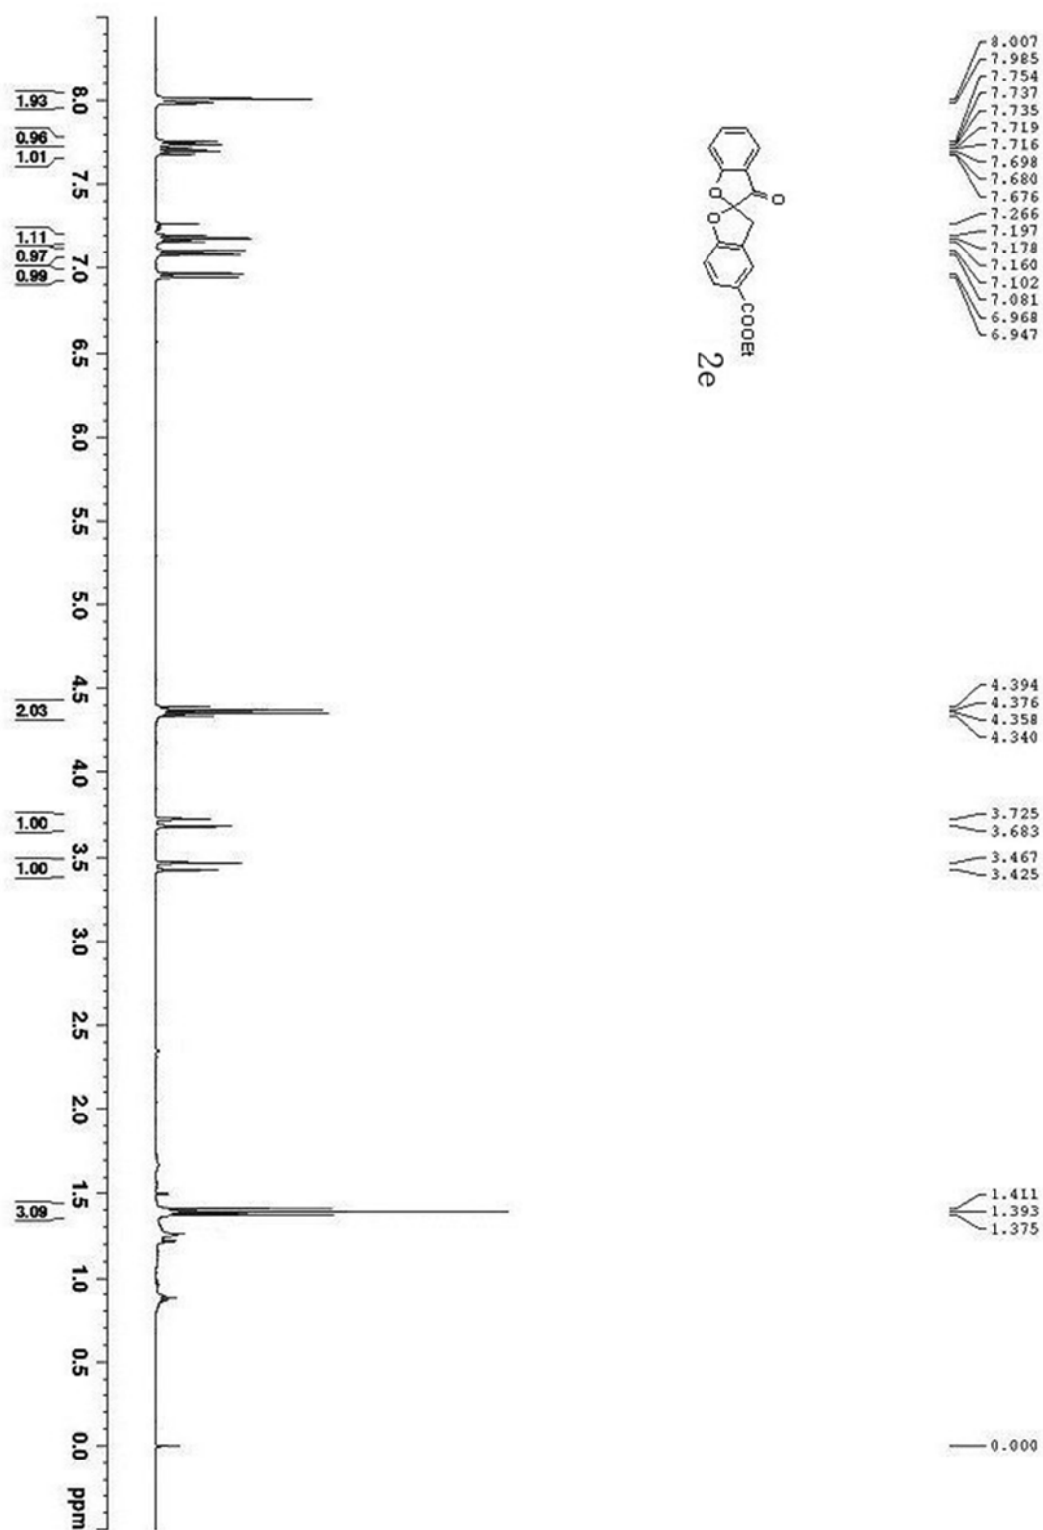

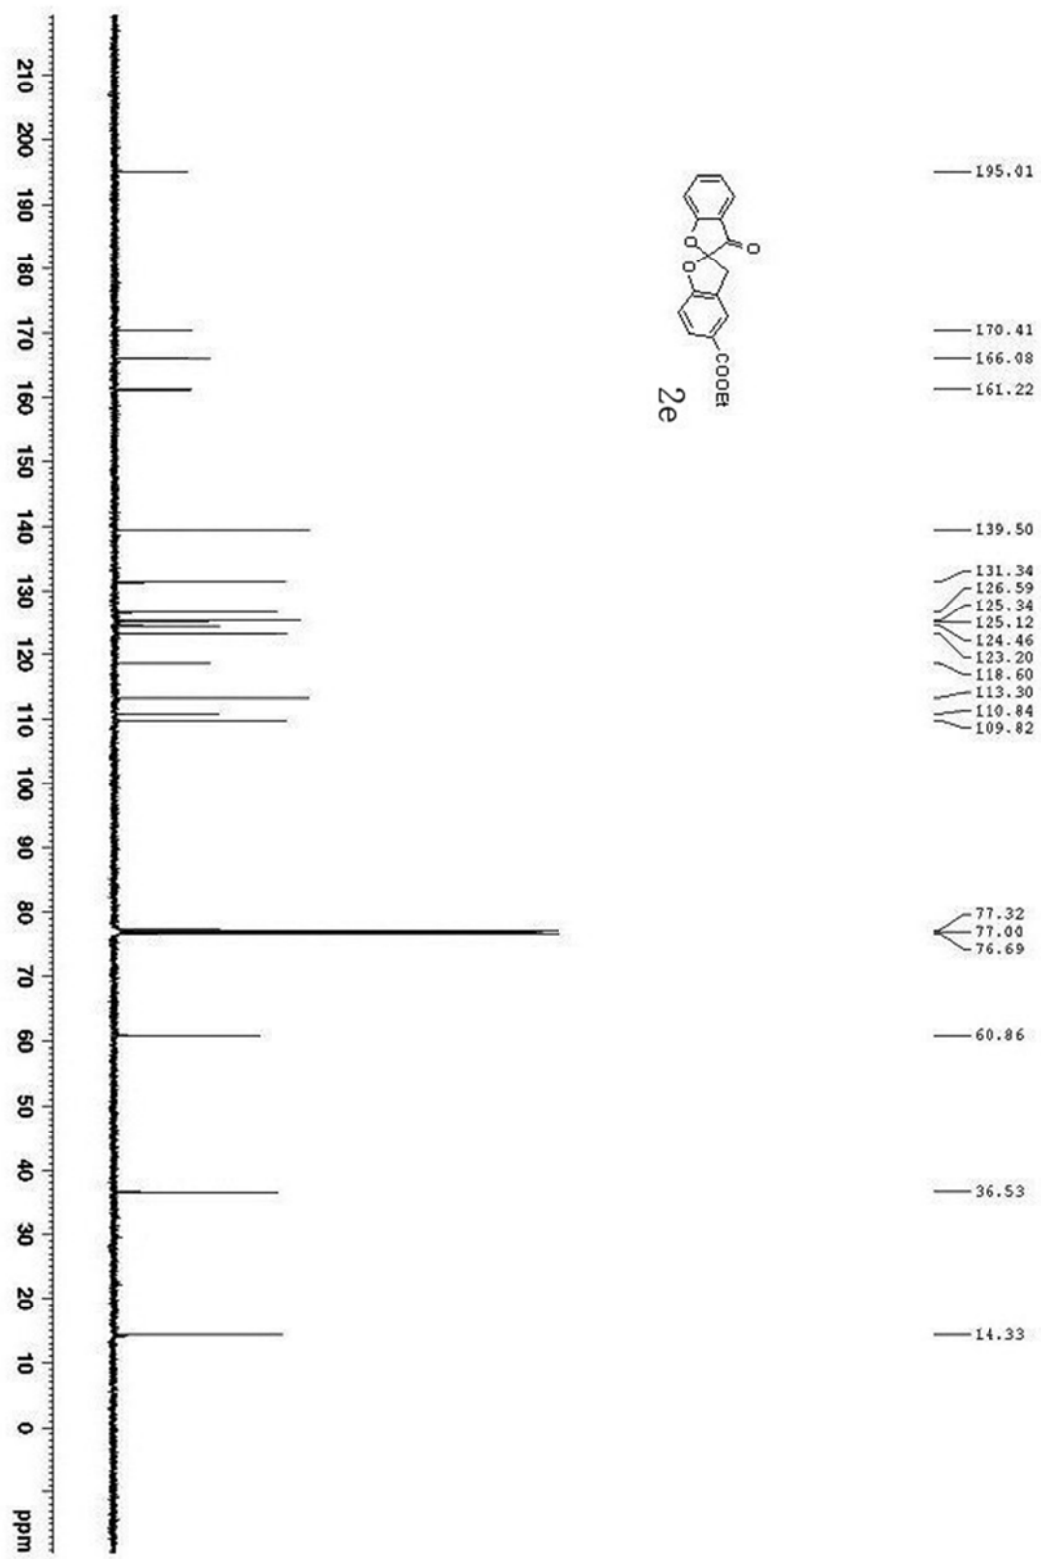

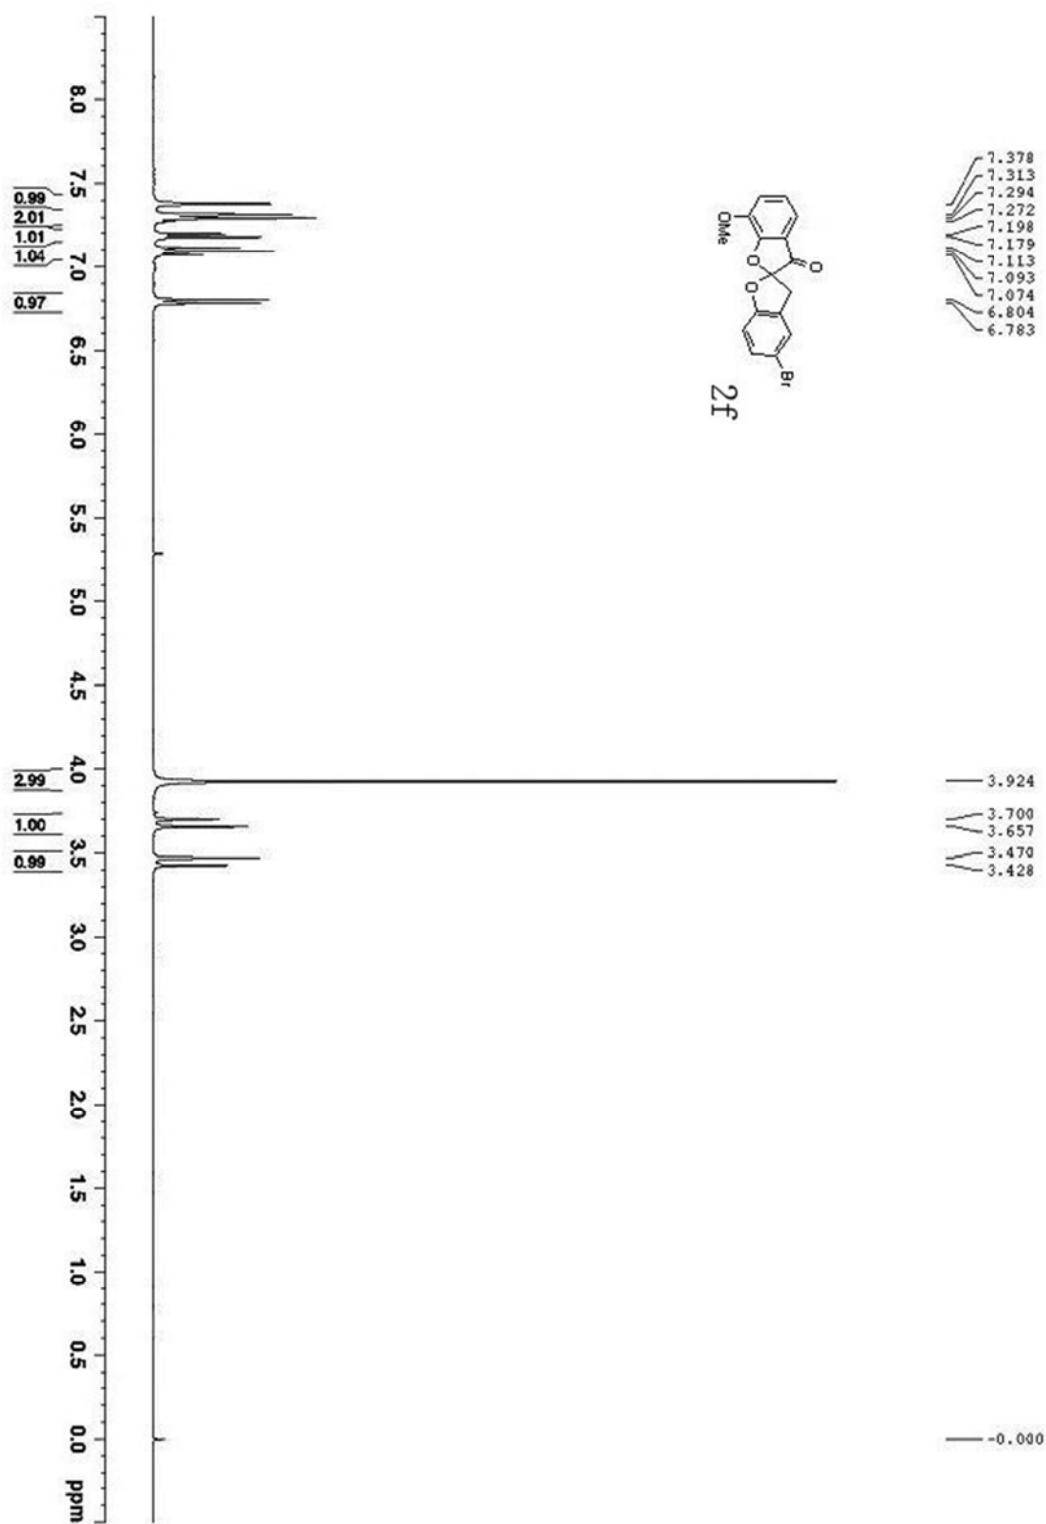

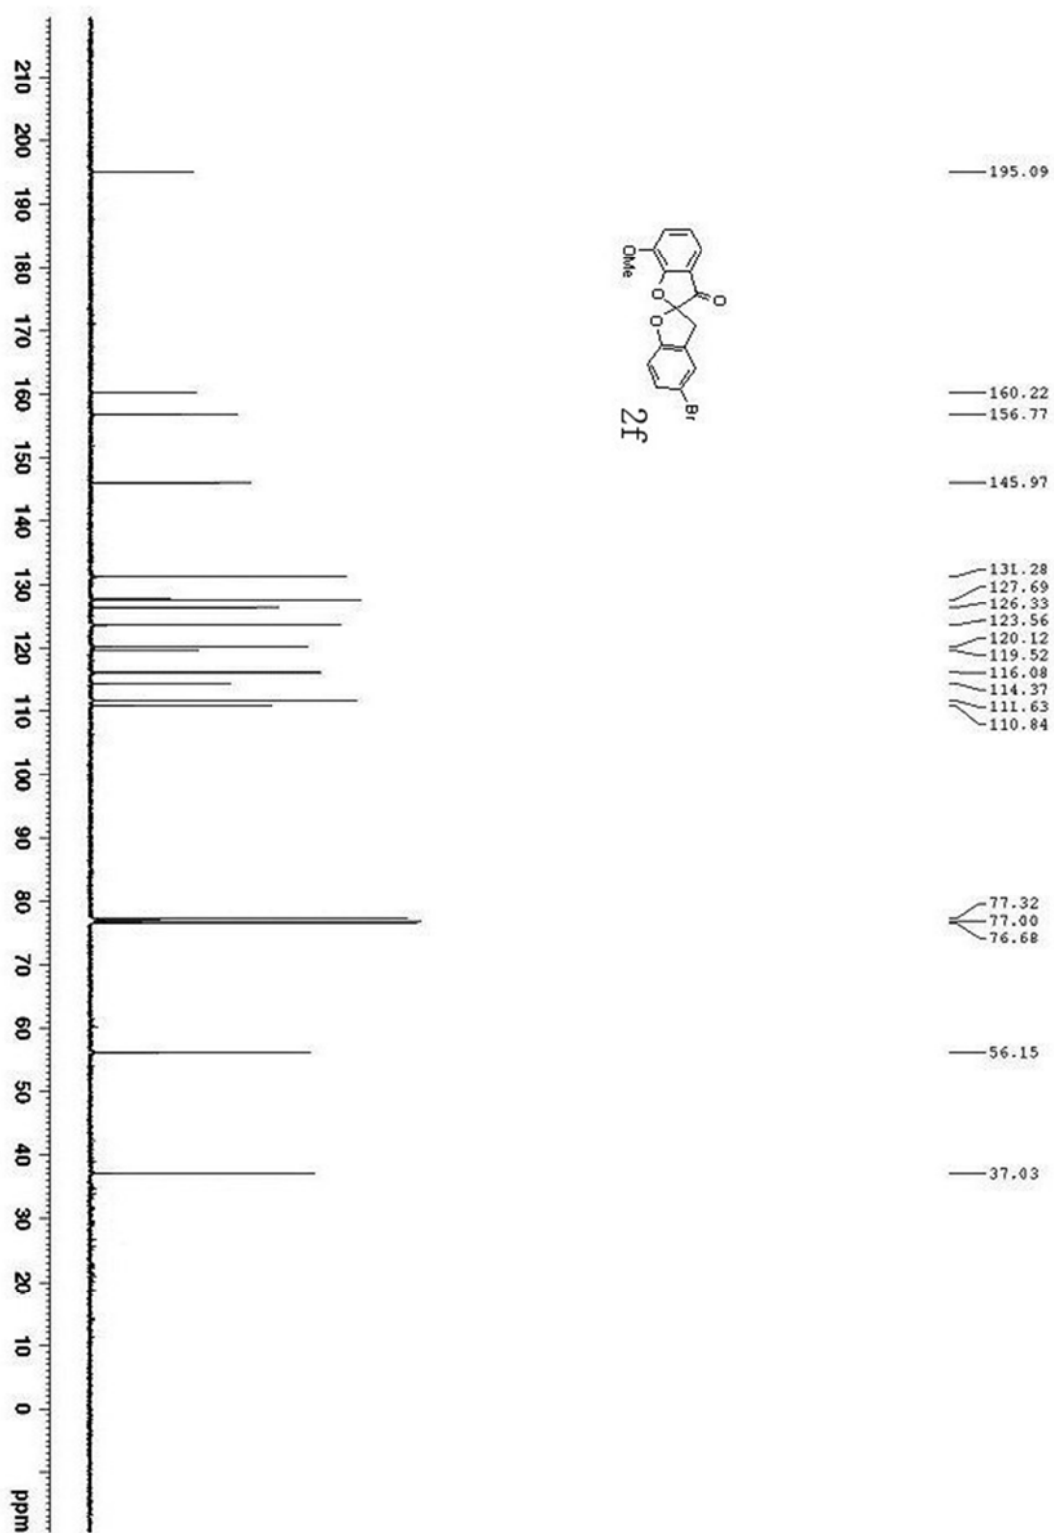

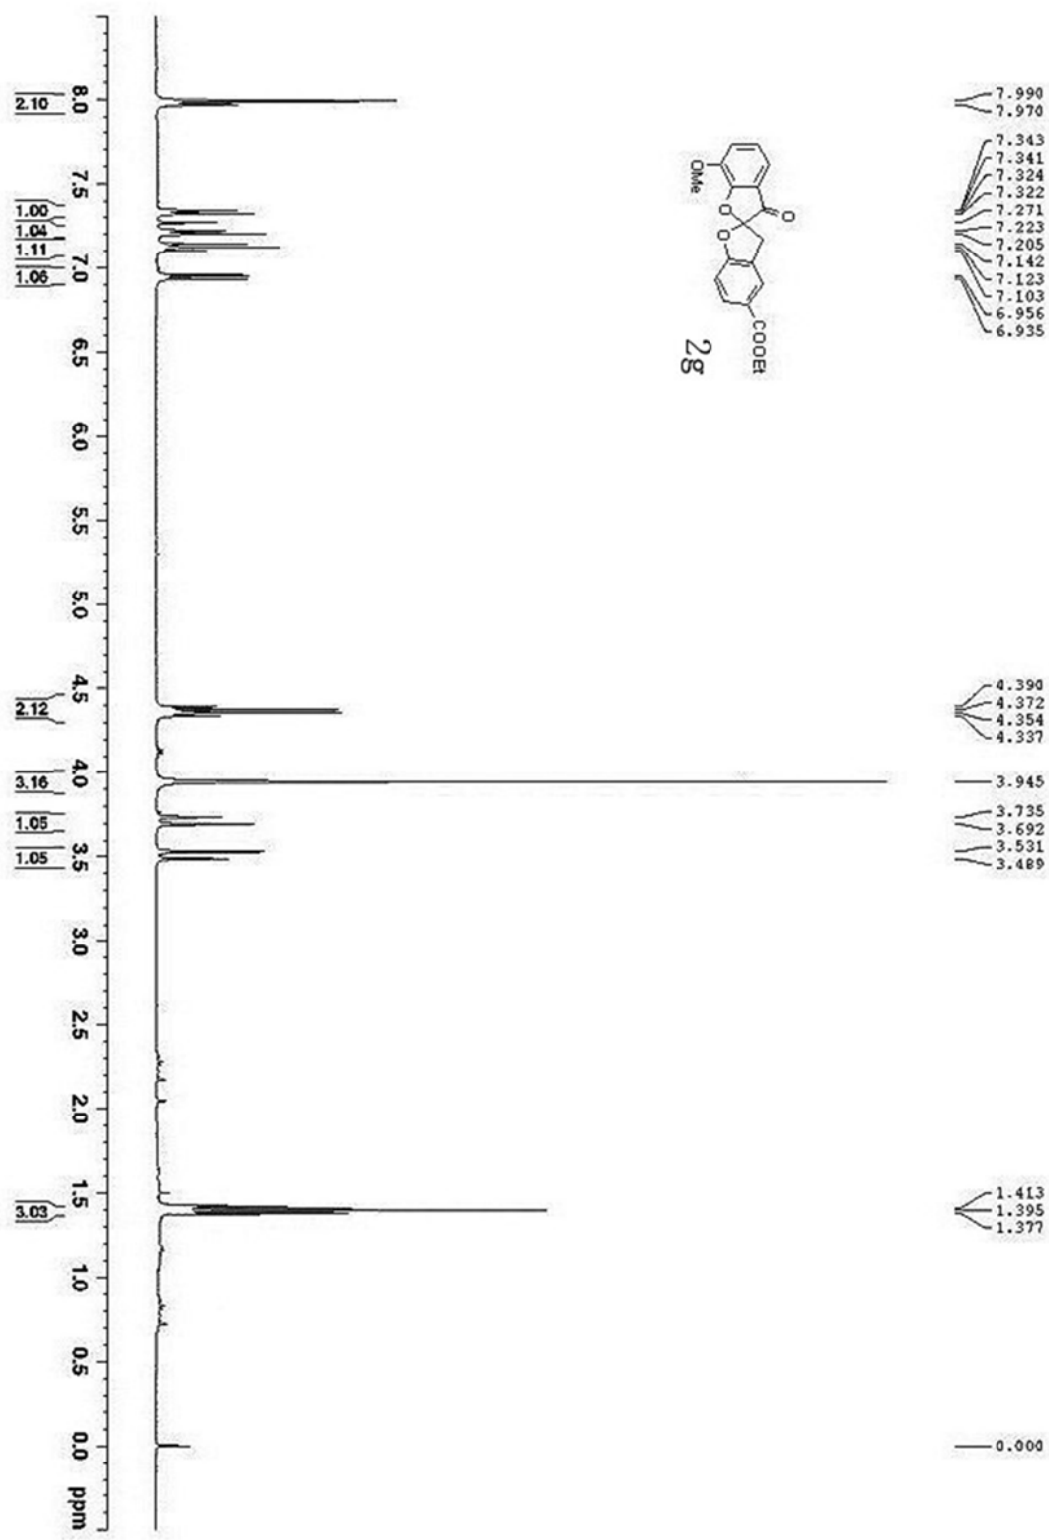

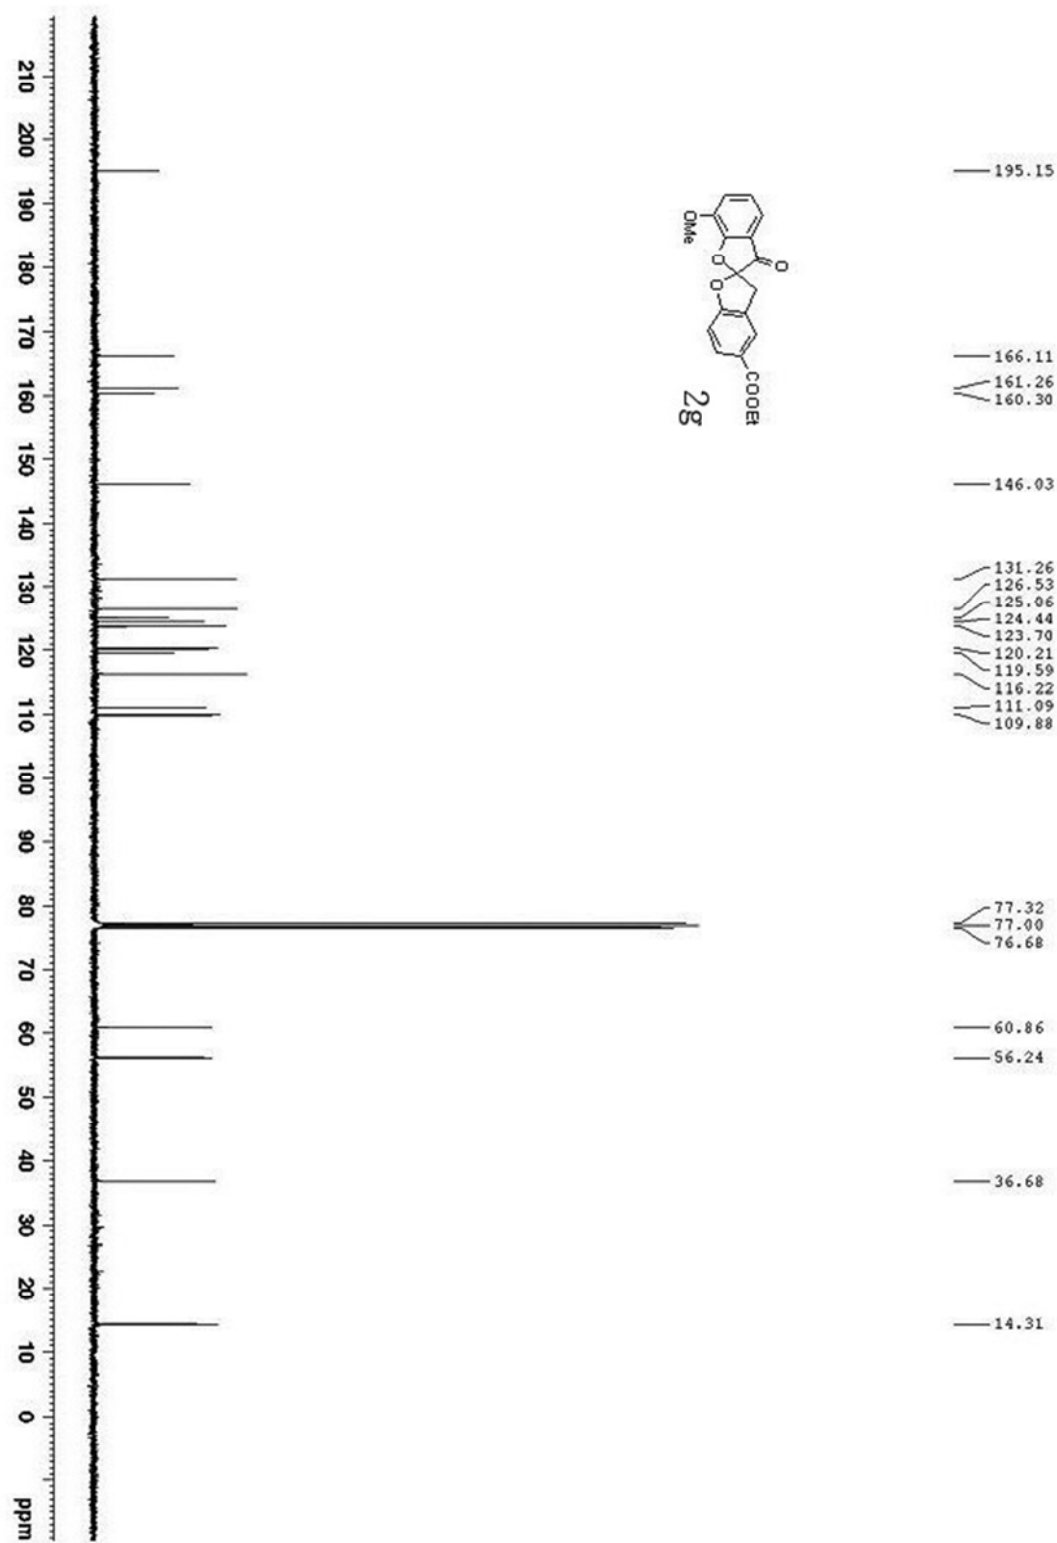

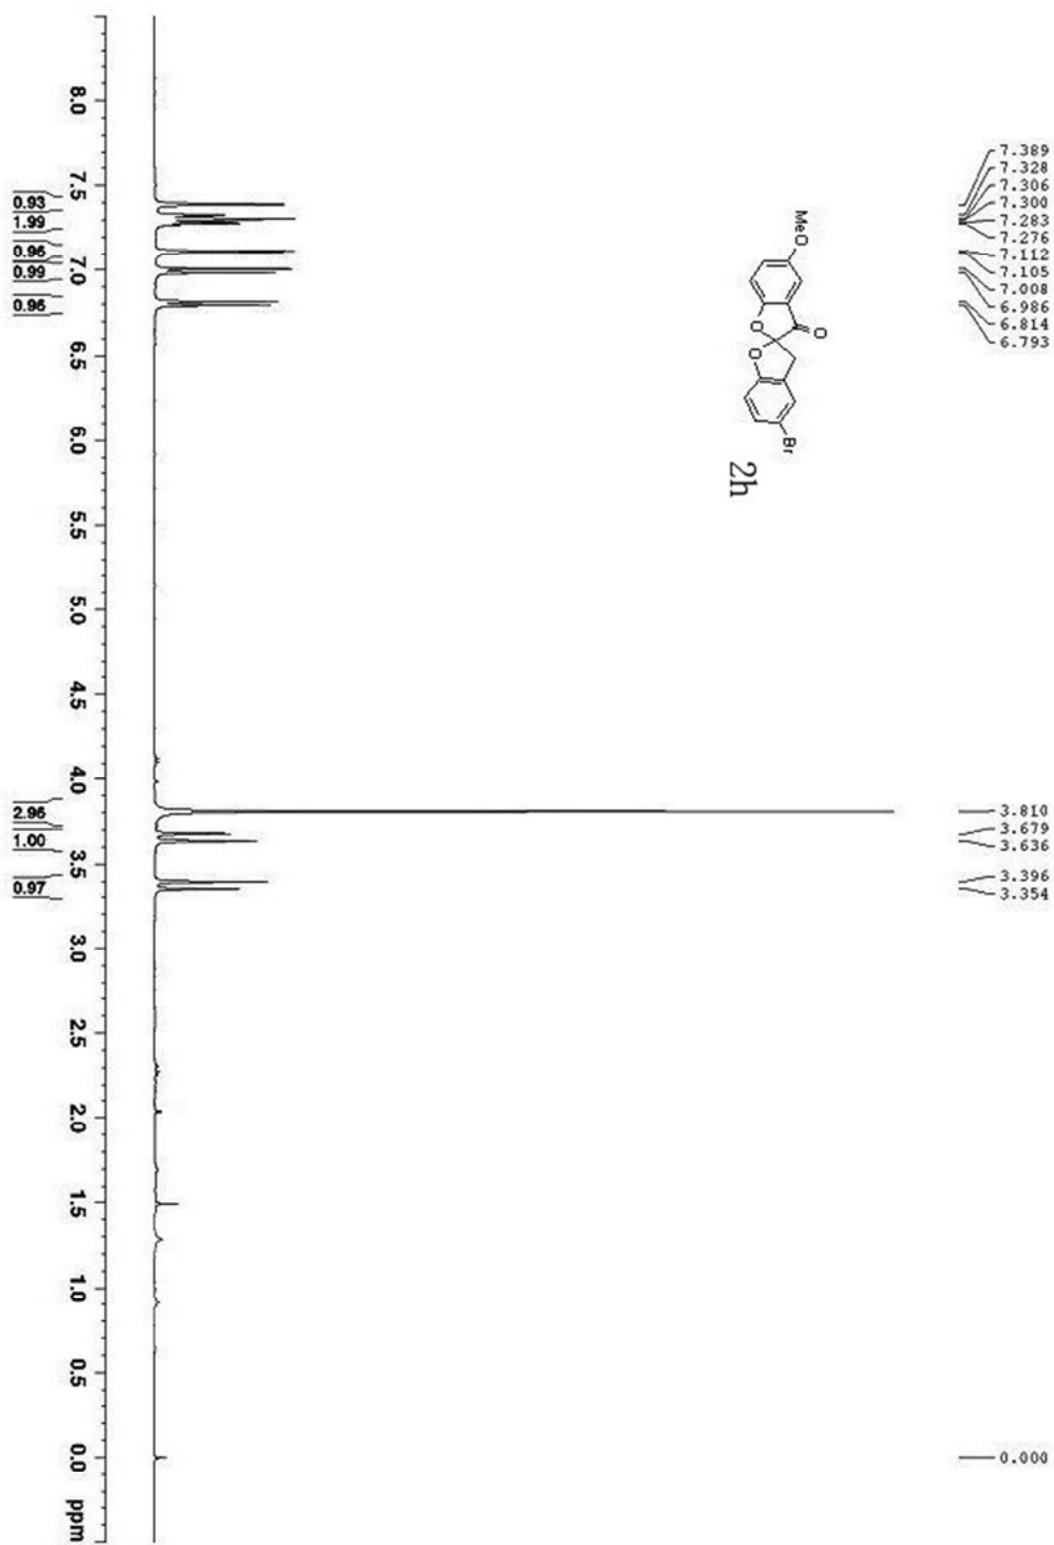

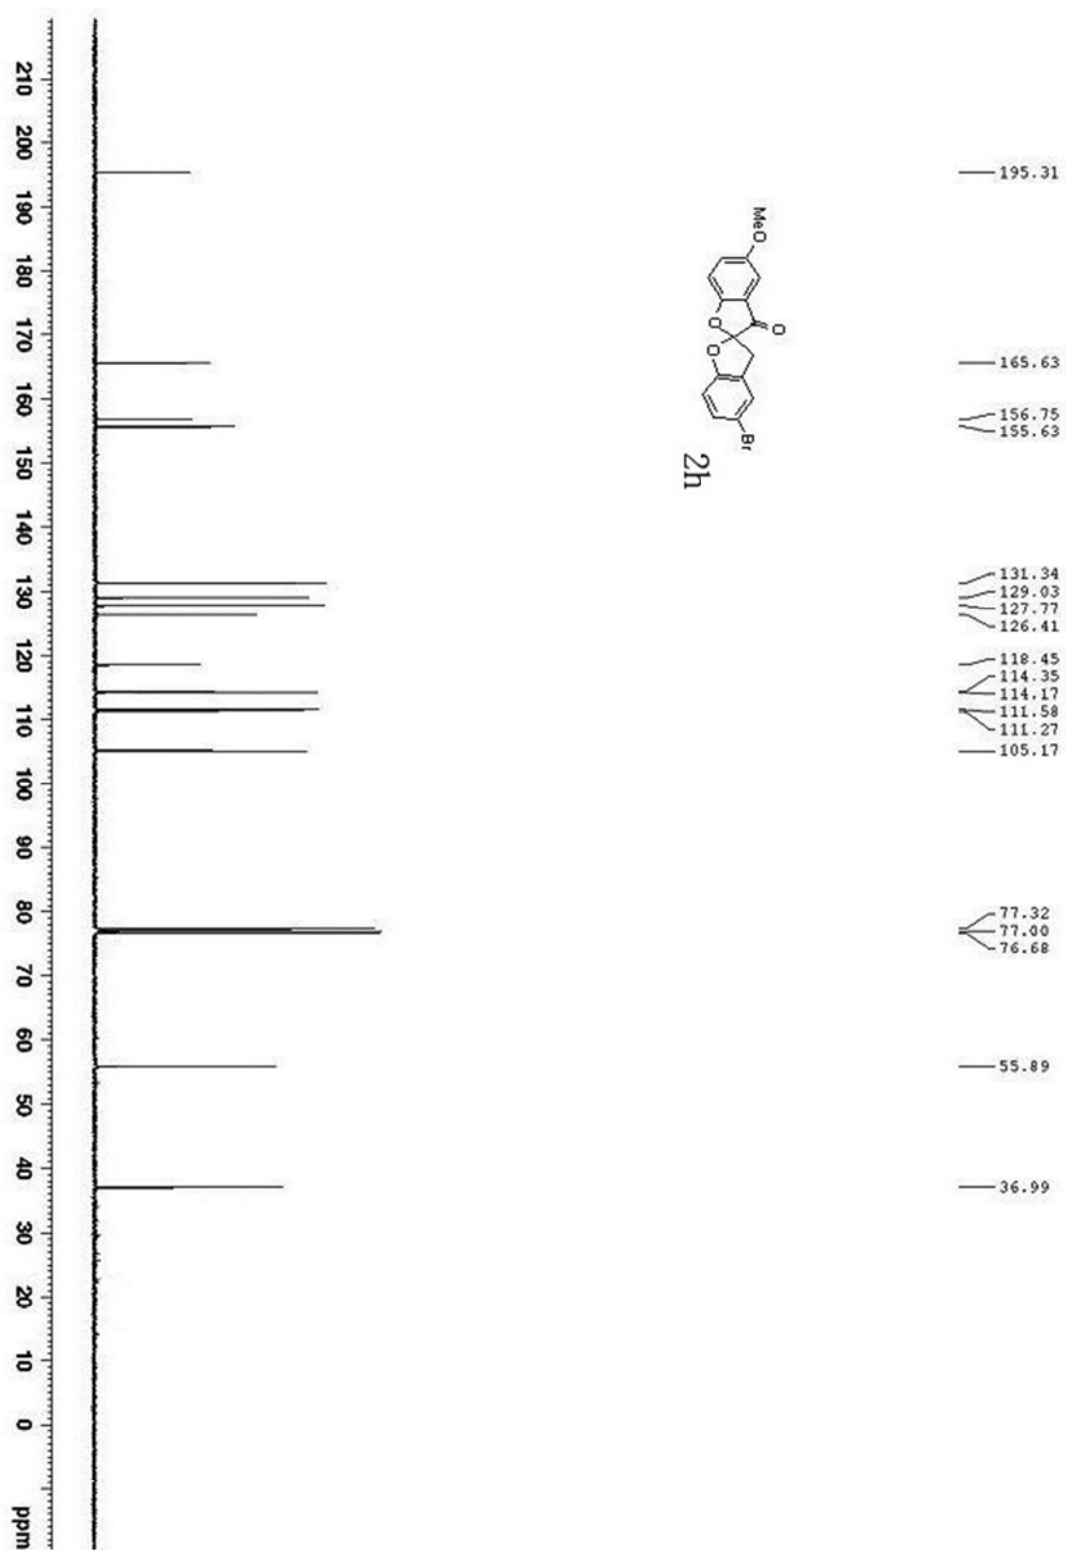



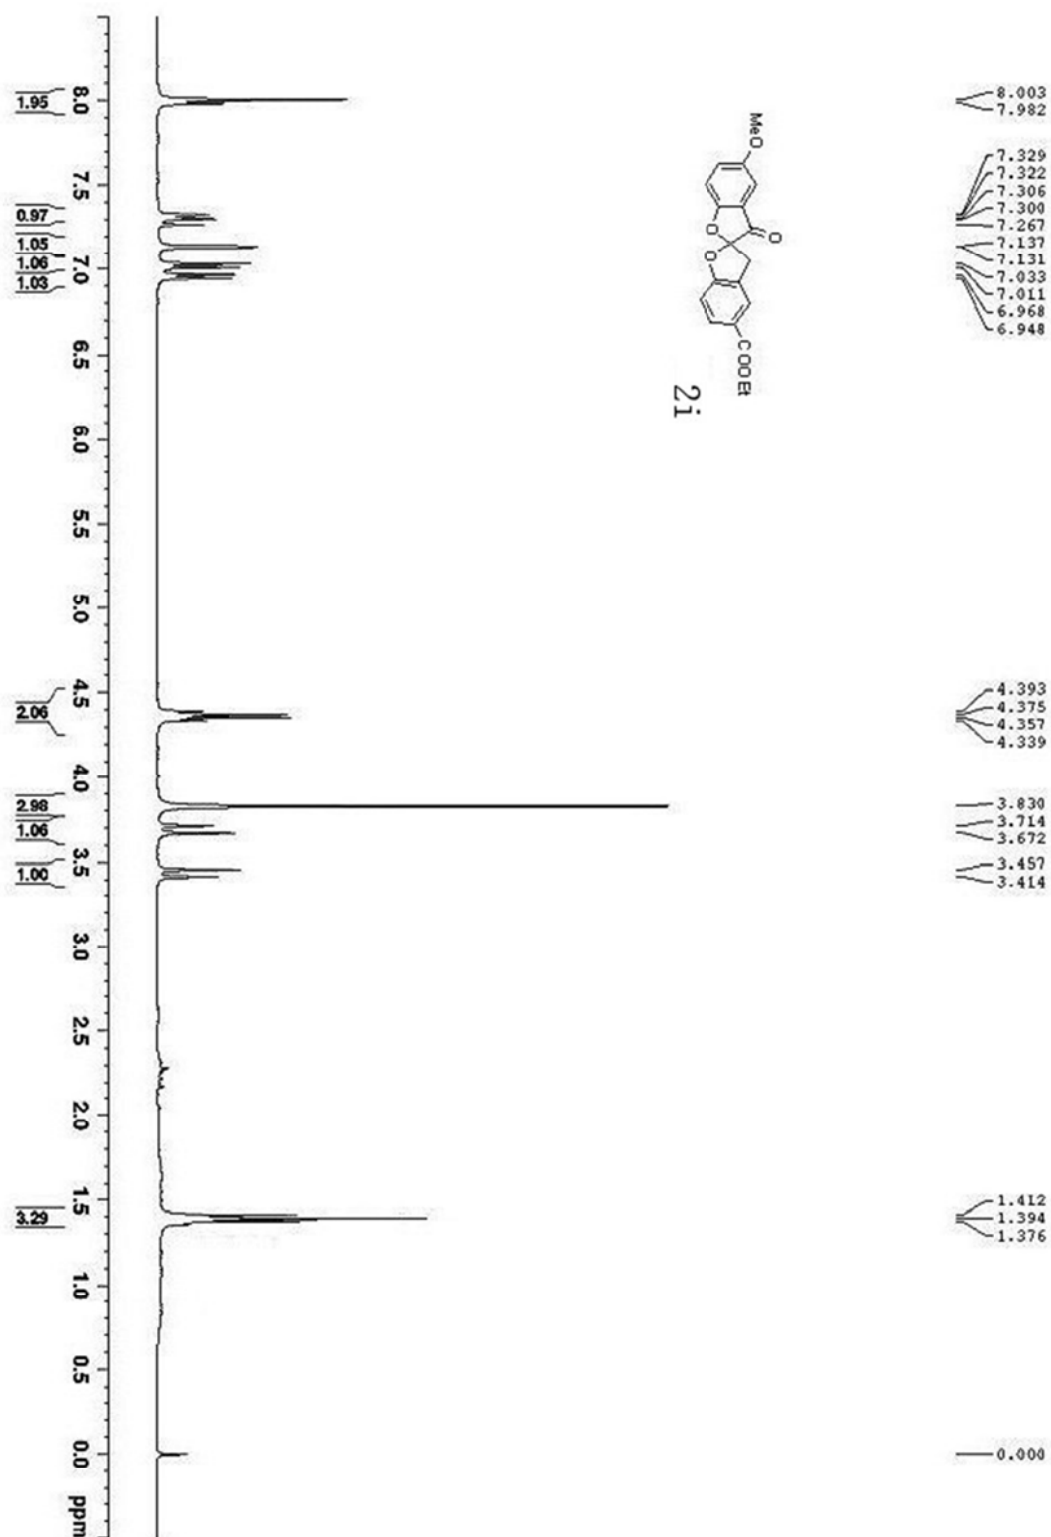

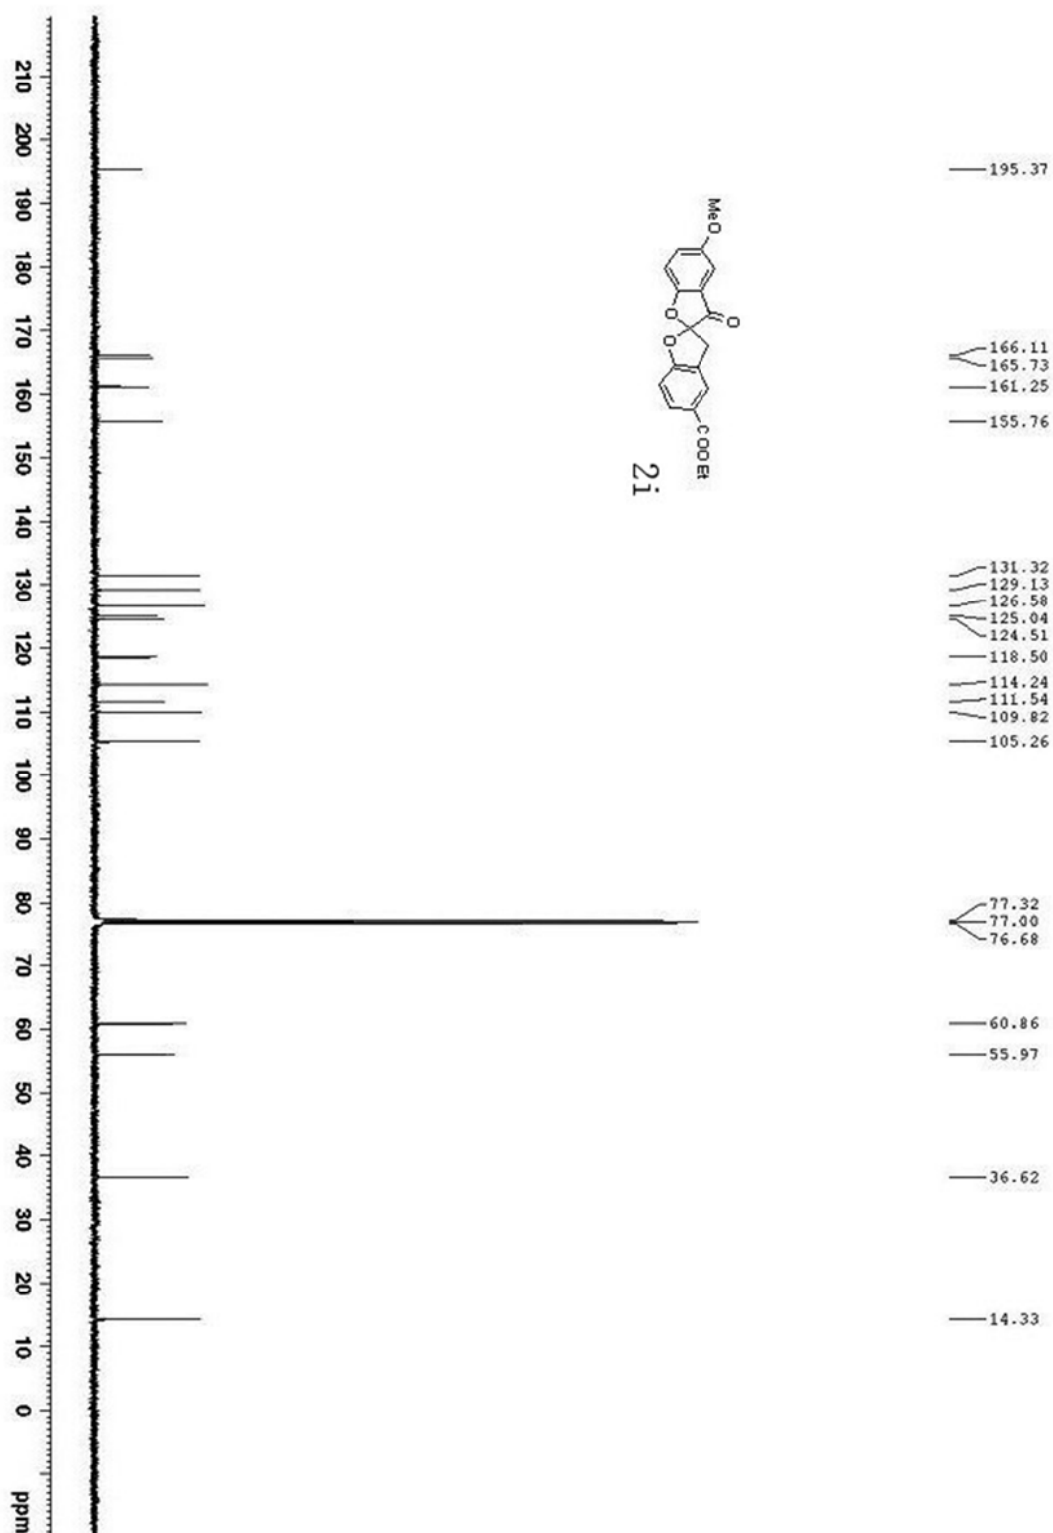

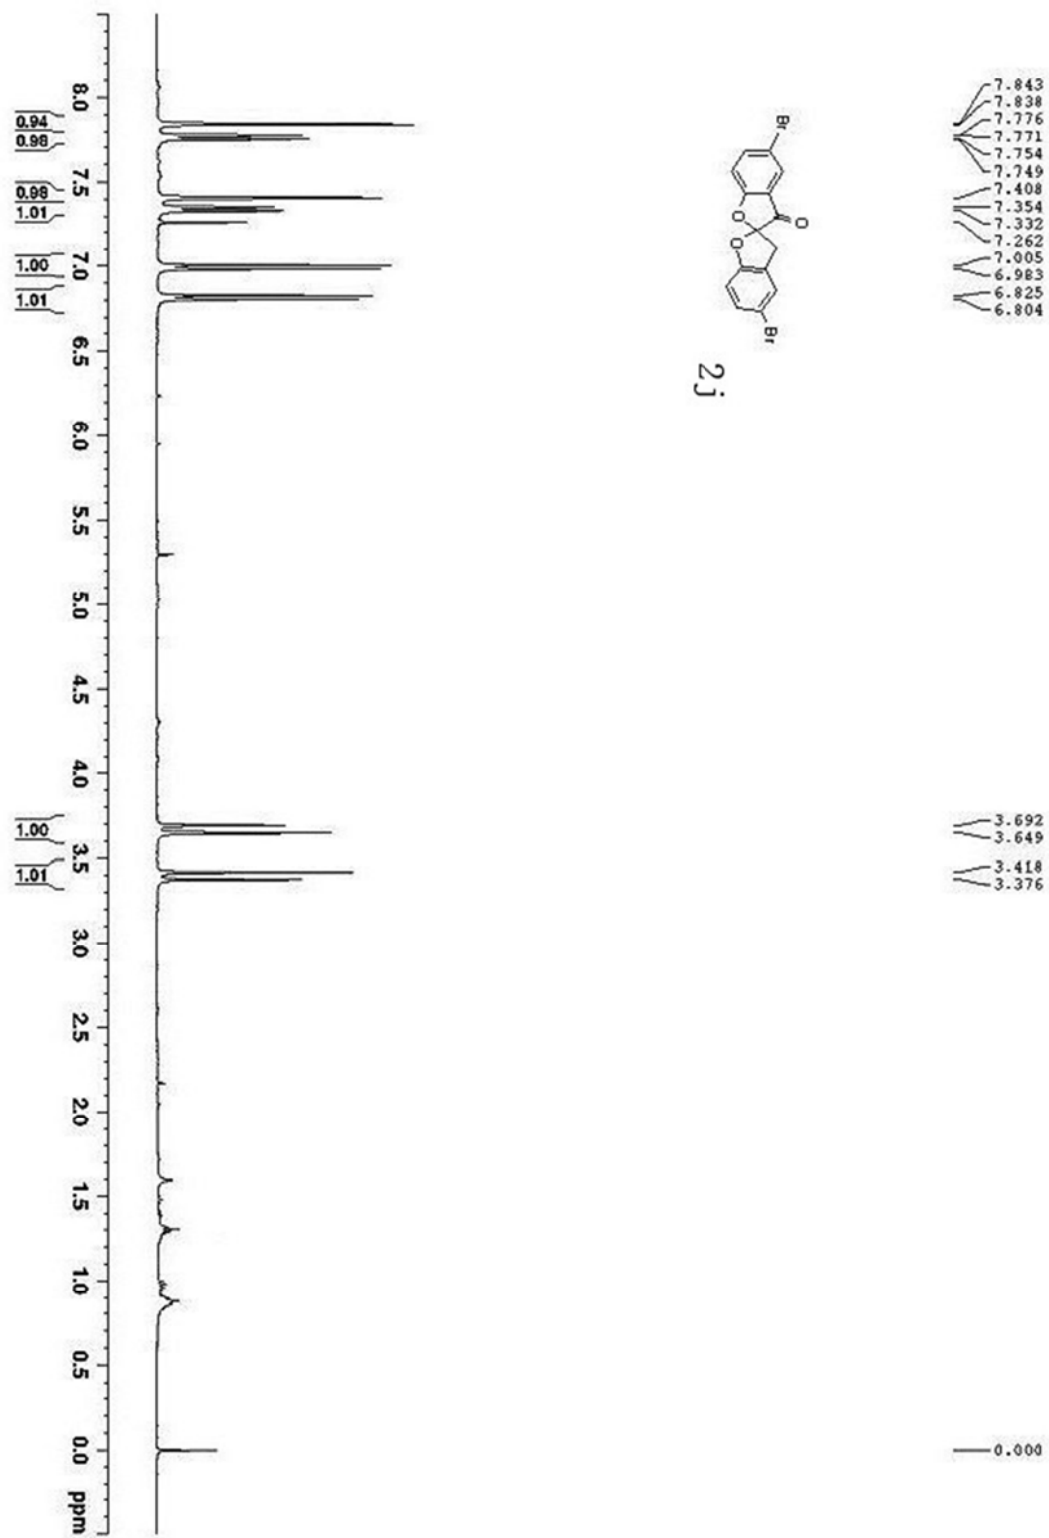

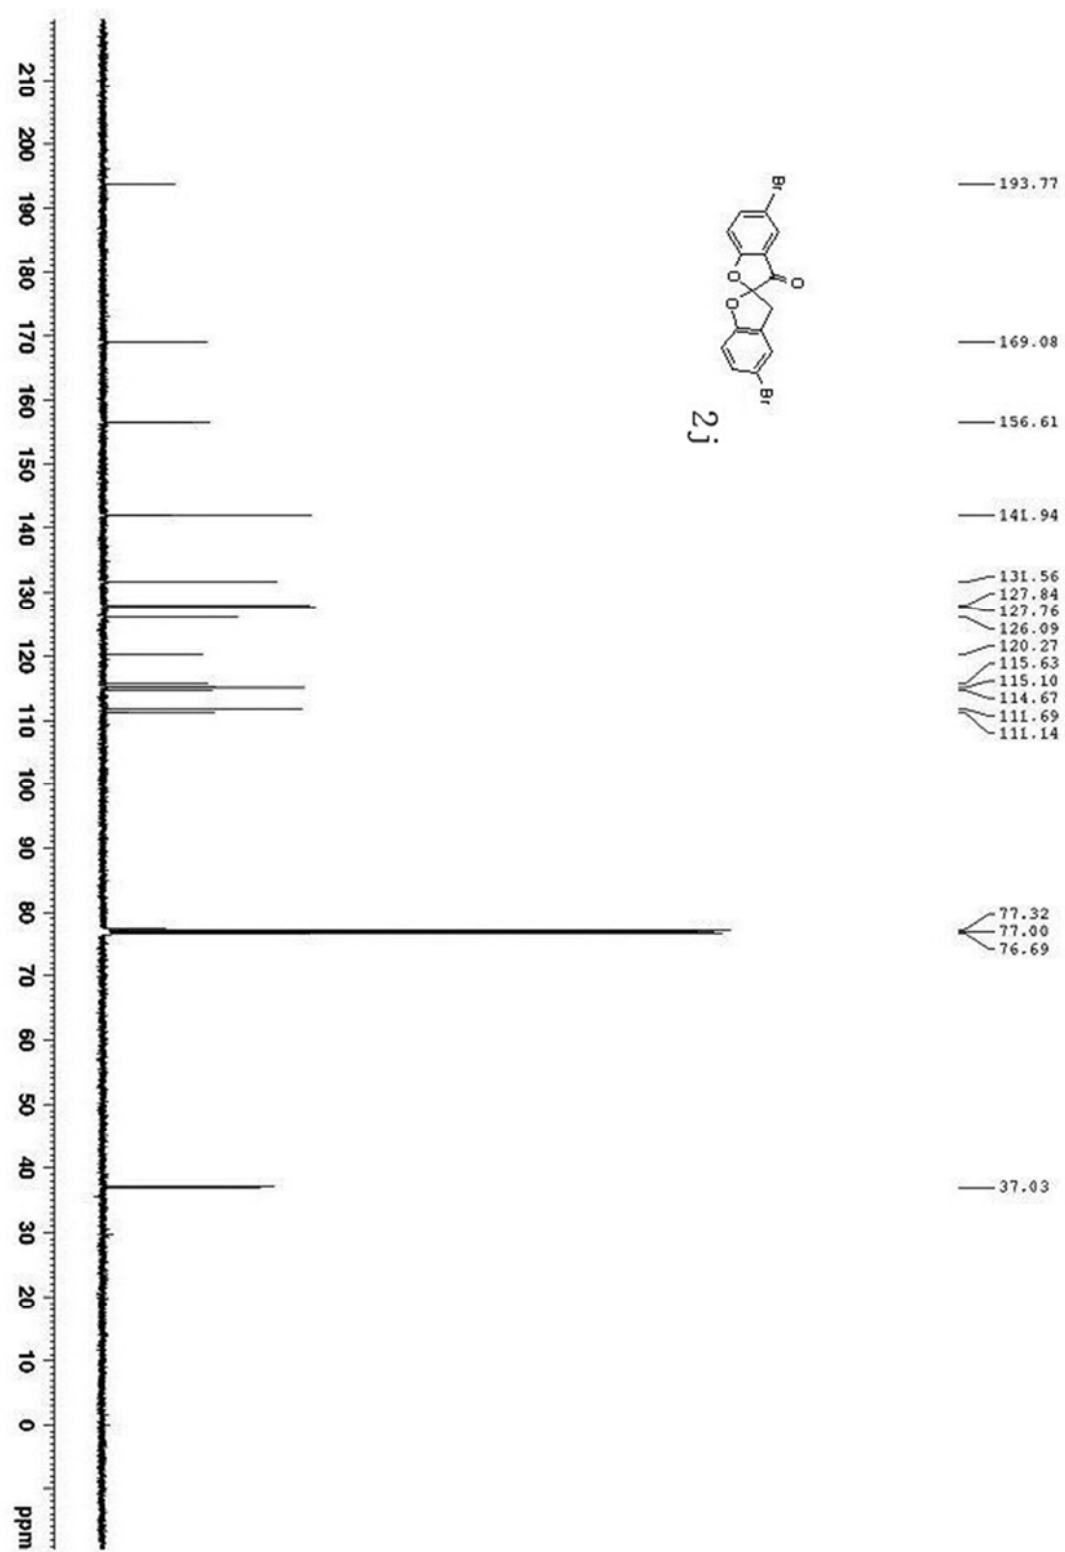

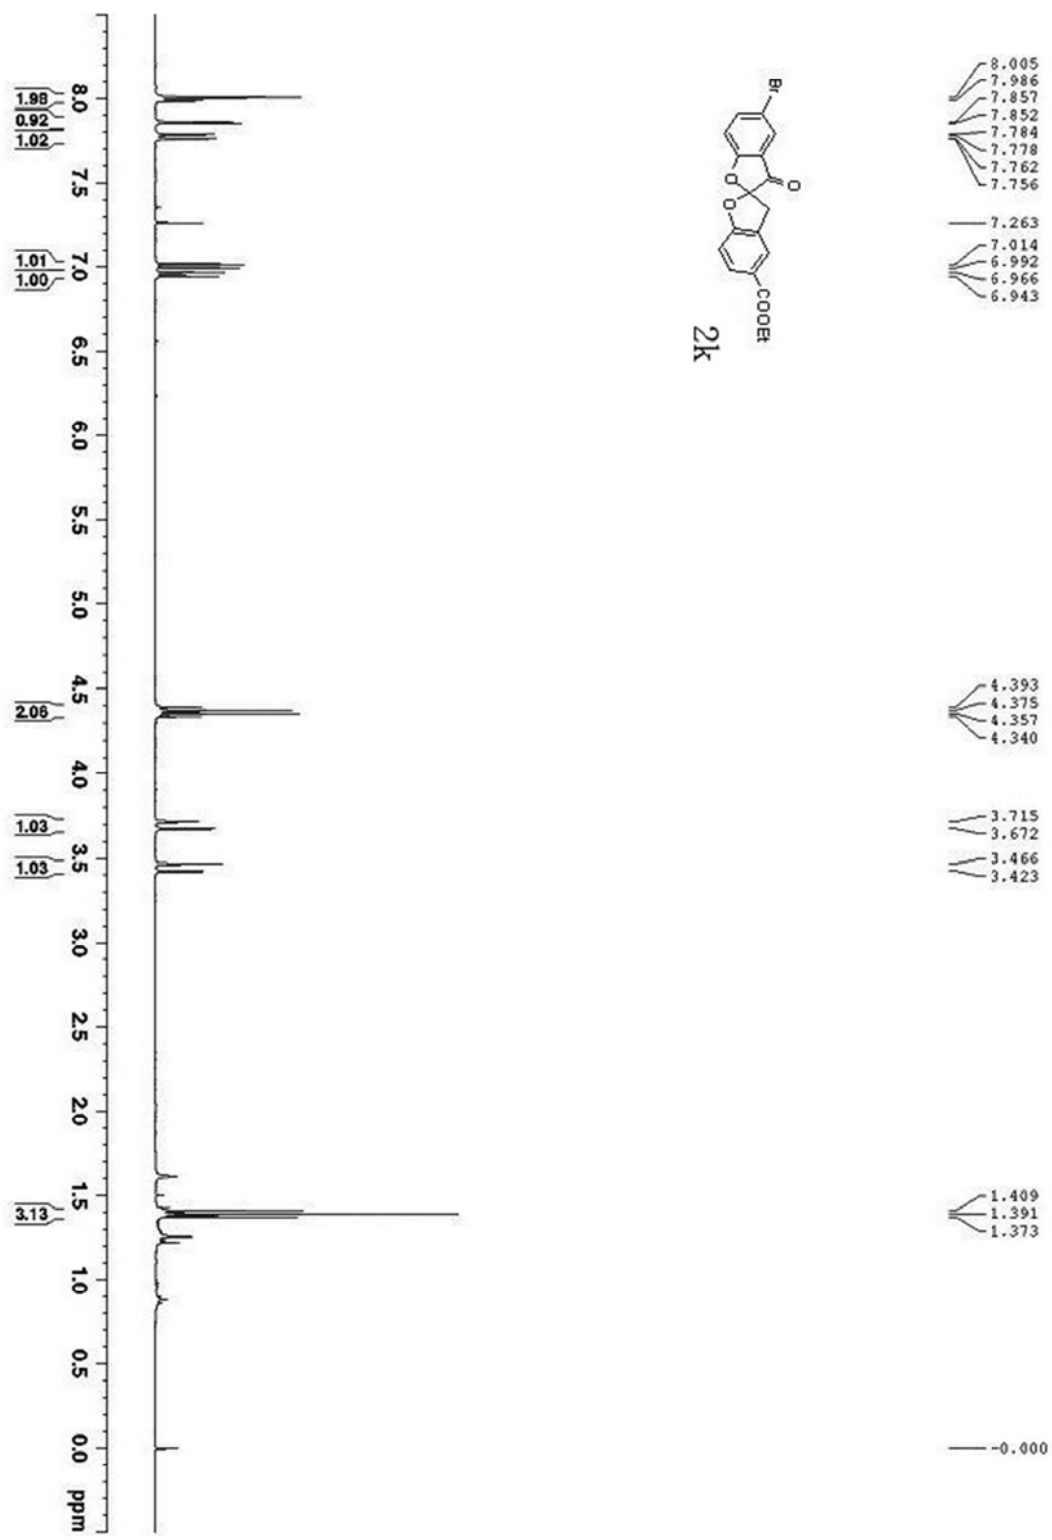

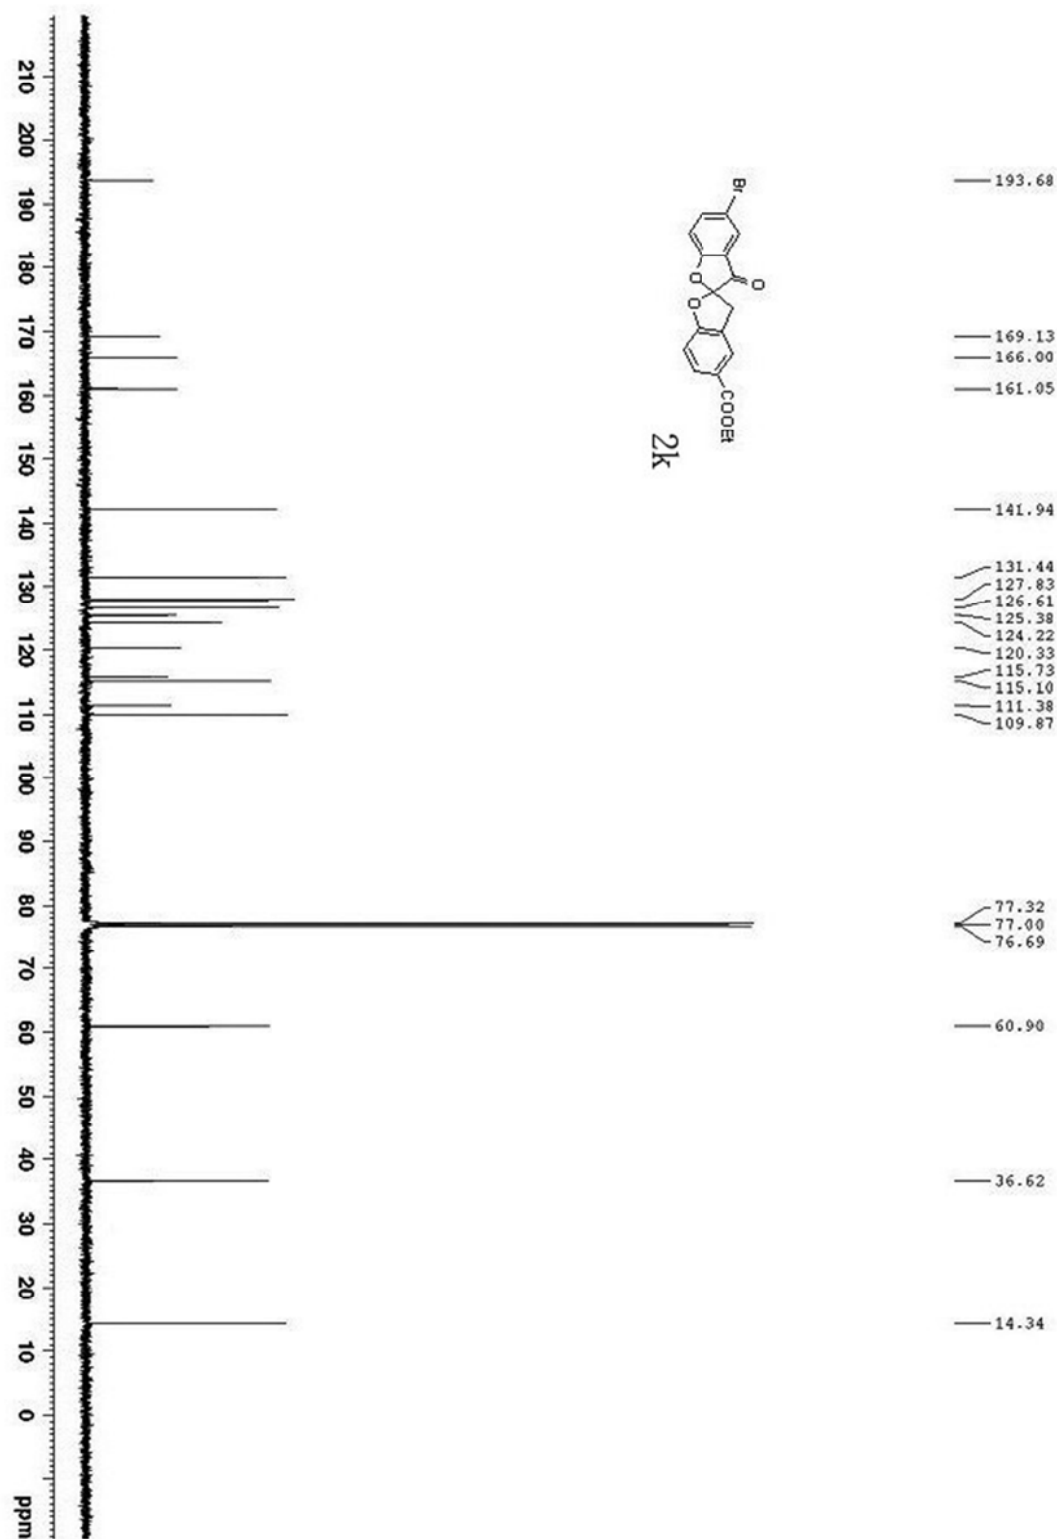

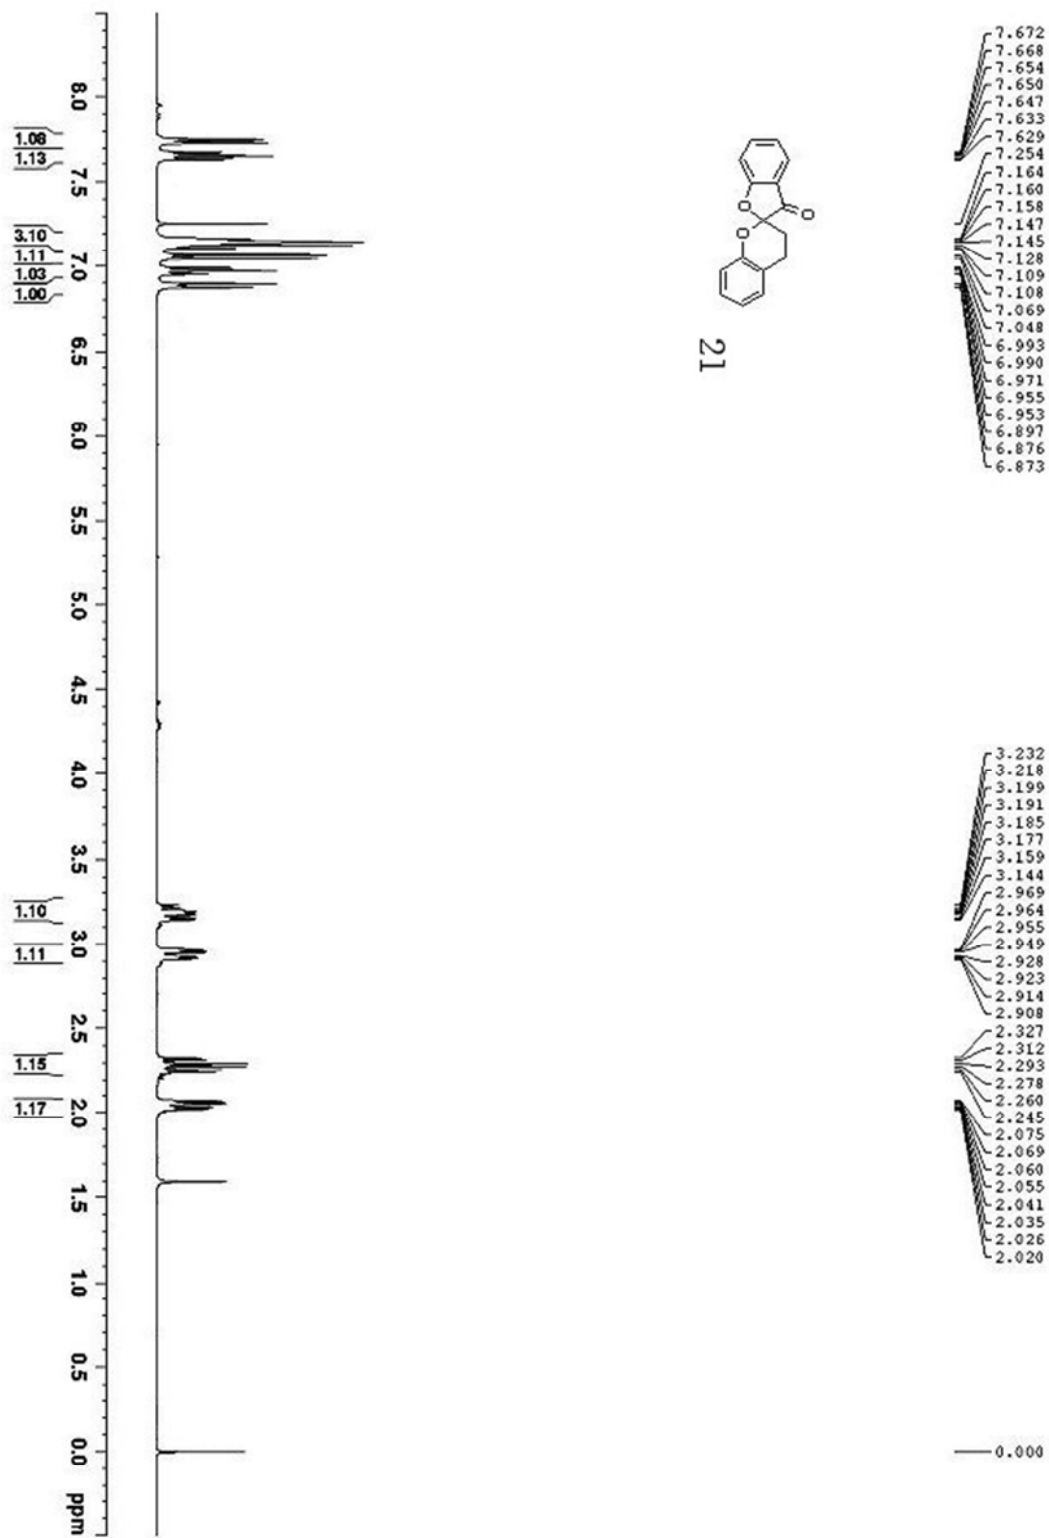

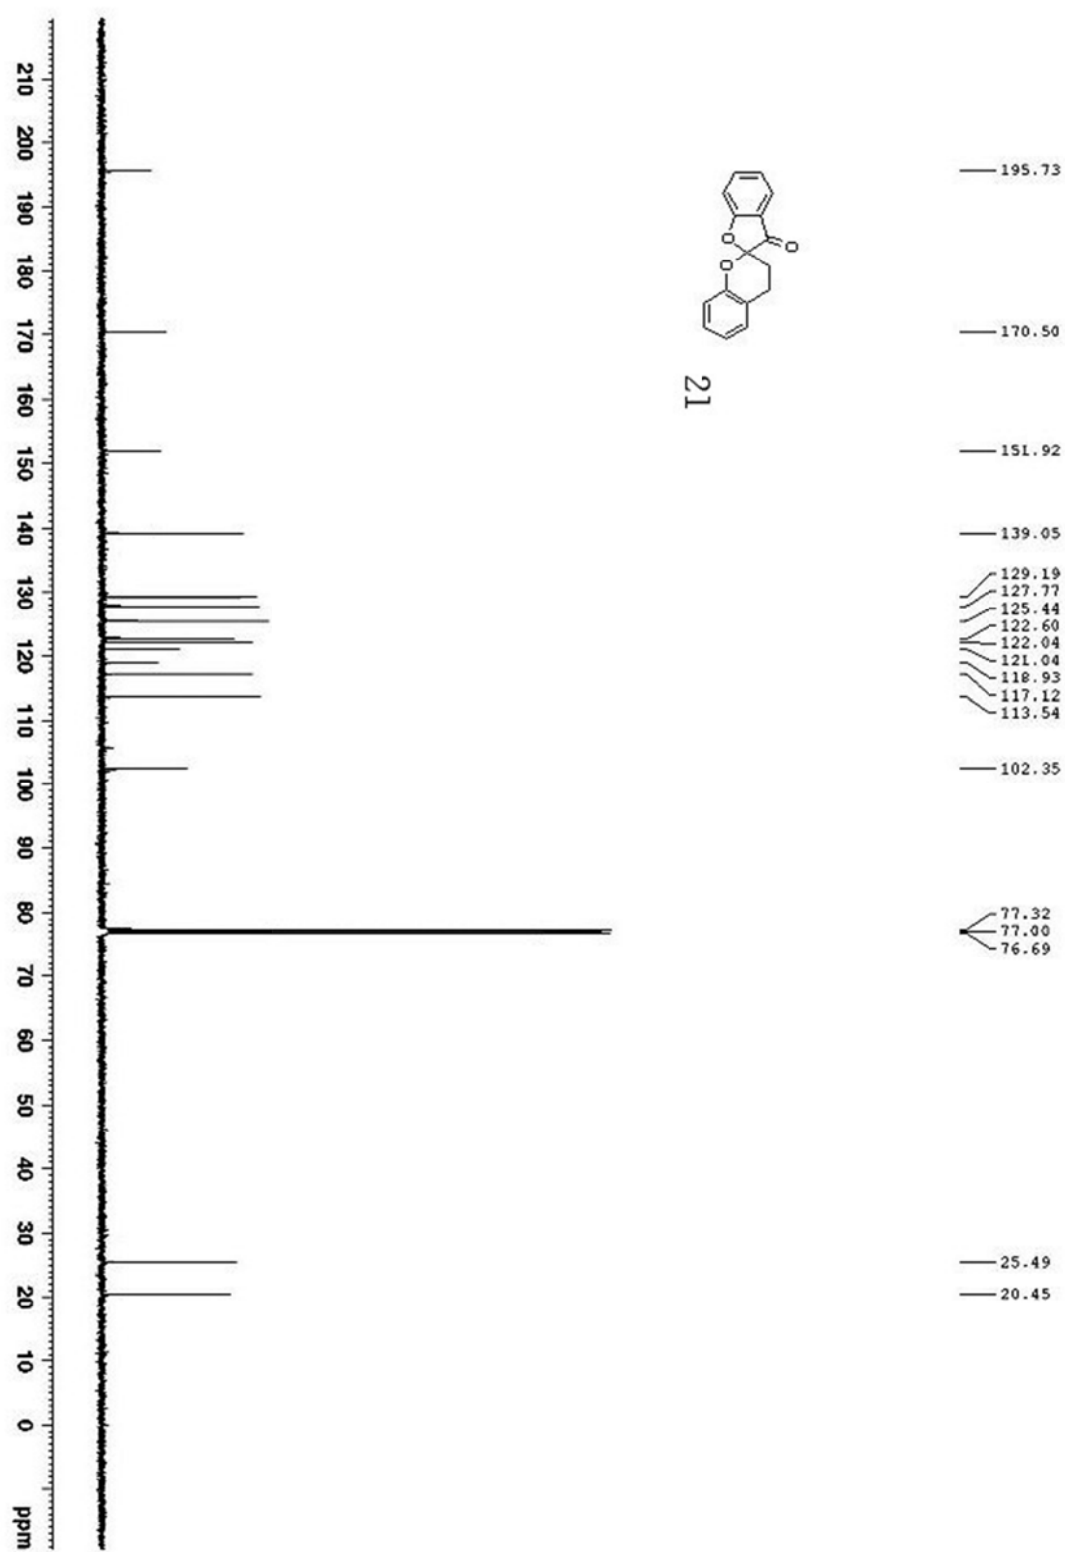



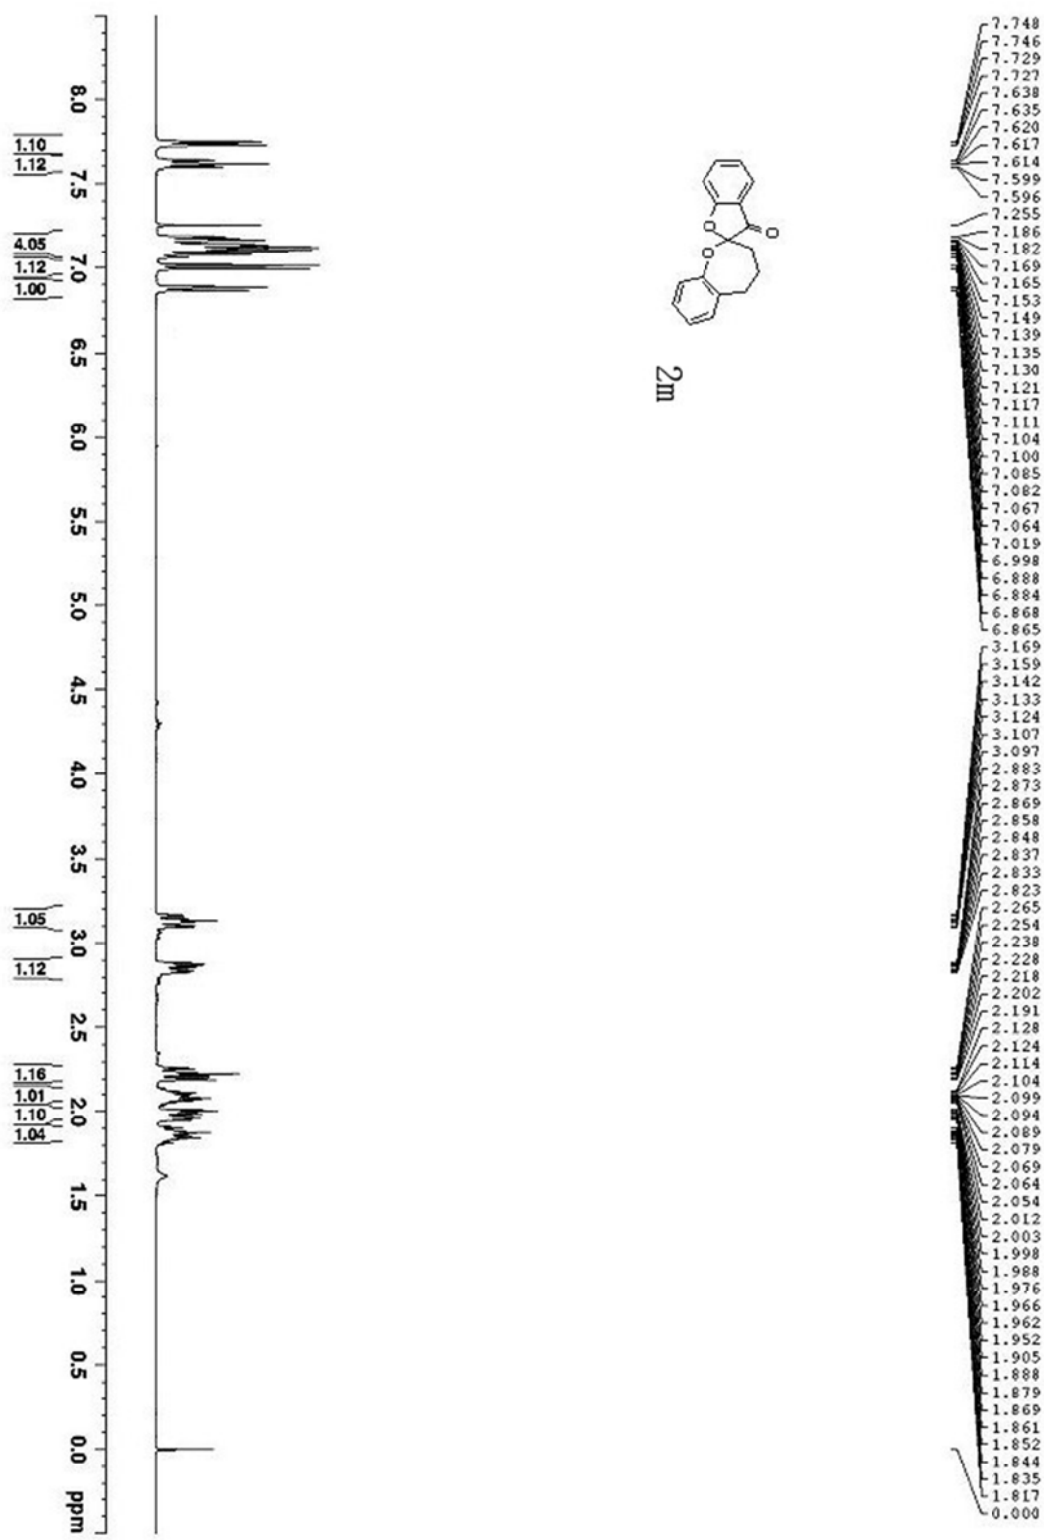

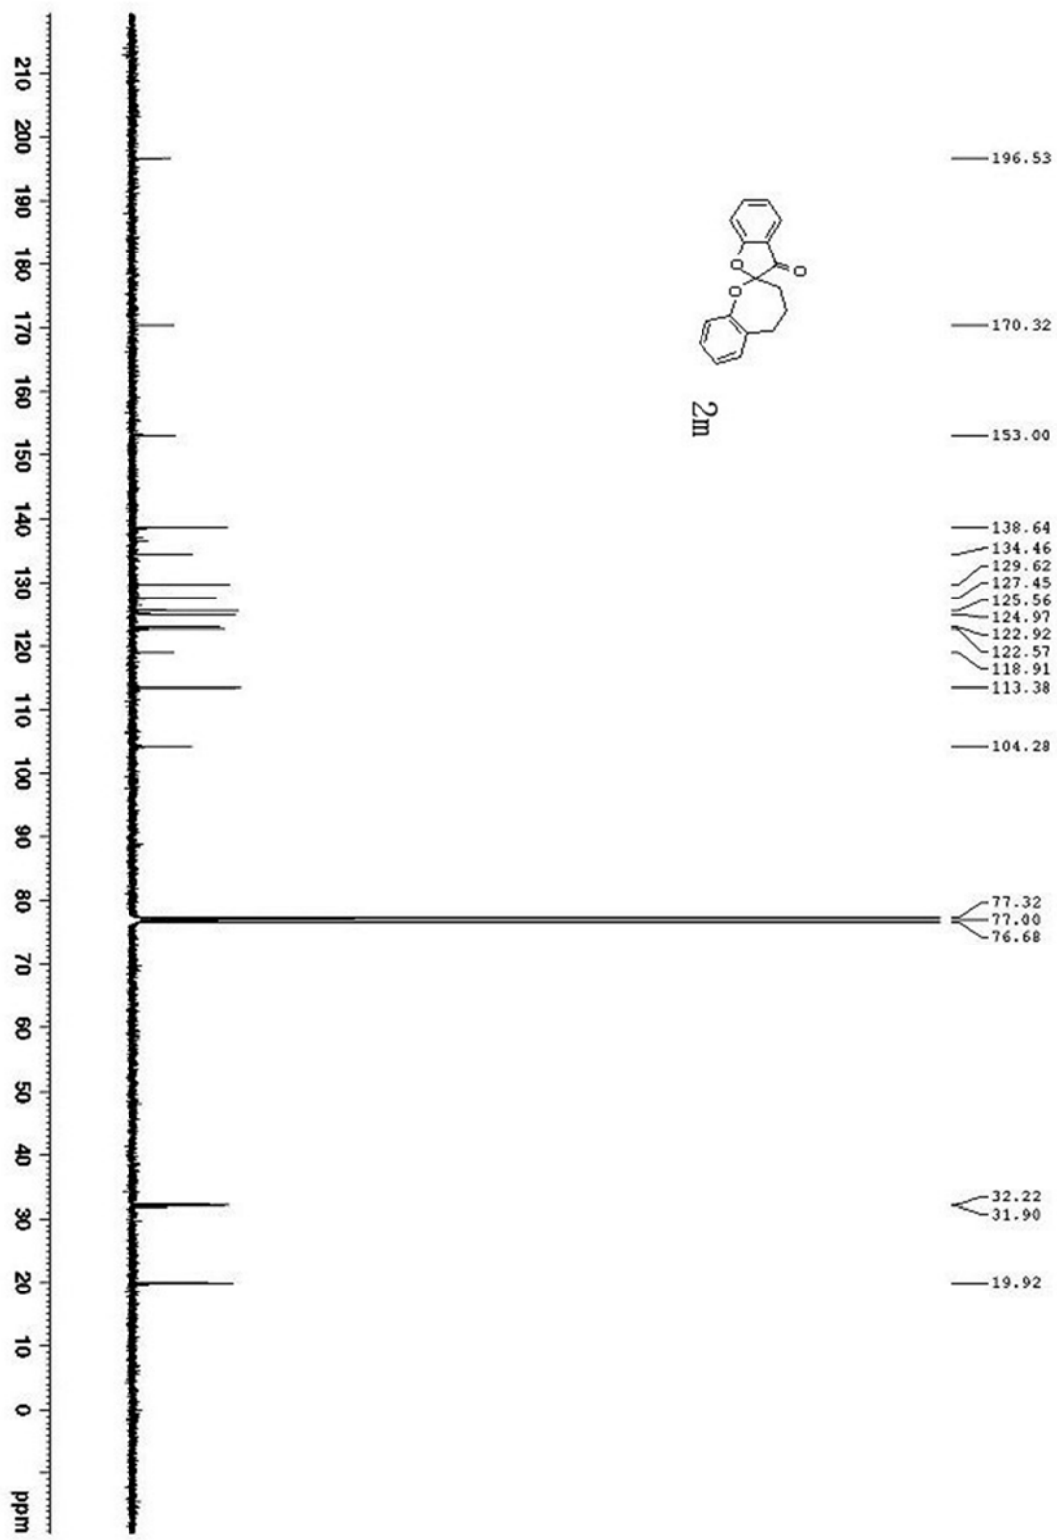

Supplement: c2ob25085c.pdf [file c2ob25085c.pdf]
